# Supplementary material for: Evaluation of vanadium coordination compounds derived from simple acetic acid hydrazide as non-conventional semiconductors
Source: Royal Society of Chemistry journal article supplement (doi:10.1039/d4tc00433g), 2024-01-01
Supplement: d4tc00433g1.pdf [file d4tc00433g1.pdf]

**Electronic Supplementary Information**

**Evaluation of vanadium coordination compounds derived from simple acetic acid  
hydrazide as non-conventional semiconductors**

Josipa Sarjanović,<sup>a</sup> Edi Topić,<sup>a</sup> Mirta Rubčić,<sup>a</sup> Lidija Androš Dubraja,<sup>b</sup>

Luka Pavić,\*<sup>b</sup> Jana Pisk\*<sup>a</sup>

<sup>a</sup>*University of Zagreb, Faculty of Science, Department of Chemistry, Horvatovac 102a,  
Zagreb, Croatia.*

<sup>b</sup>*Ruđer Bošković Institute, Bijenička cesta 54, Zagreb, Croatia*

*\*Corresponding authors*

*E-mail addresses: [jana.pisk@chem.pmf.hr](mailto:jana.pisk@chem.pmf.hr), [lpavic@irb.hr](mailto:lpavic@irb.hr)*

## Contents

|                                                                                                                                                                                                                                                                                                                                                                                     |    |
|-------------------------------------------------------------------------------------------------------------------------------------------------------------------------------------------------------------------------------------------------------------------------------------------------------------------------------------------------------------------------------------|----|
| <b>Scheme S1.</b> Vanadium coordination complexes - synthetic pathways. ....                                                                                                                                                                                                                                                                                                        | 5  |
| <b>Scheme S2.</b> Hydrazidato =N–NH–(C=O)– and hydrazonato =N–N=(C–O)– ligand forms and reversible deprotonation.....                                                                                                                                                                                                                                                               | 6  |
| <b>Figure S1.</b> IR–ATR ligand spectra $H_2L^3$ .....                                                                                                                                                                                                                                                                                                                              | 7  |
| <b>Figure S2.</b> DSC curve for the ligand $H_2L^3$ .....                                                                                                                                                                                                                                                                                                                           | 7  |
| <b>Figure S3.</b> IR–ATR spectra for the complex $(NH_4)[VO_2(L^1)]$ ( <b>1</b> ).....                                                                                                                                                                                                                                                                                              | 8  |
| <b>Figure S4.</b> IR–ATR spectra for the complex $[VO(L^1)(OMe)(MeOH)]$ ( <b>2</b> ).....                                                                                                                                                                                                                                                                                           | 8  |
| <b>Figure S5.</b> IR–ATR spectra for the complex $[VO_2(HL^2)]$ ( <b>4</b> ).....                                                                                                                                                                                                                                                                                                   | 9  |
| <b>Figure S6.</b> IR–ATR spectra for the complex $[VO(L^3)(OEt)(H_2O)]$ ( <b>5</b> ).....                                                                                                                                                                                                                                                                                           | 9  |
| <b>Figure S7.</b> IR–ATR spectra for the complex $[VO_2(HL^3)]_2 \cdot 2H_2O$ ( <b>6</b> ).....                                                                                                                                                                                                                                                                                     | 10 |
| <b>Figure S8.</b> IR–ATR spectra for the complex $[VO(L^3)(OMe)(MeOH)]$ ( <b>7</b> ).....                                                                                                                                                                                                                                                                                           | 10 |
| <b>Figure S9.</b> TGA/DSC curve for the complex $(NH_4)[VO_2(L^1)]$ ( <b>1</b> ).....                                                                                                                                                                                                                                                                                               | 11 |
| <b>Figure S10.</b> TGA/DSC curve for the complex $[VO(L^1)(OMe)(MeOH)]$ ( <b>2</b> ).....                                                                                                                                                                                                                                                                                           | 11 |
| <b>Figure S11.</b> TGA/DSC curve for the complex $[VO_2(HL^2)]$ .....                                                                                                                                                                                                                                                                                                               | 12 |
| <b>Figure S12.</b> TGA/DSC curve for the complex $[VO(L^3)(OEt)(H_2O)]$ ( <b>5</b> ).....                                                                                                                                                                                                                                                                                           | 12 |
| <b>Figure S13.</b> TGA/DSC curve for the complex $[VO_2(HL^3)]_2 \cdot 2H_2O$ ( <b>6</b> ).....                                                                                                                                                                                                                                                                                     | 13 |
| <b>Figure S14.</b> TGA/DSC curve for the complex $[VO(L^3)(OMe)(MeOH)]$ ( <b>7</b> ).....                                                                                                                                                                                                                                                                                           | 13 |
| <b>Table S1.</b> Experimental and crystallographic data for compounds $(NH_4)[VO_2(L^1)]$ ( <b>1</b> ), $[VO(L^1)(OMe)(MeOH)]$ ( <b>2</b> ), $[VO(L^2)(OMe)(MeOH)] \cdot MeOH$ ( <b>3</b> ), $[VO(L^3)(OEt)(H_2O)]$ ( <b>5</b> ), $[VO_2(HL^3)]_2 \cdot 2H_2O$ ( <b>6</b> ), $[VO(L^3)(OMe)(MeOH)]$ ( <b>7</b> ), in this work.....                                                 | 14 |
| <b>Table S2.</b> Selected bond lengths, angles and hydrogen bond parameters in the crystal structure of $[VO(L^2)(OMe)(MeOH)] \cdot MeOH$ ( <b>3</b> ).....                                                                                                                                                                                                                         | 16 |
| <b>Figure S15.</b> (a) Supramolecular dimers formed through $R44(14)$ hydrogen bonded motif. Crystal packing in $[VO(L^2)(OMe)(MeOH)] \cdot MeOH$ ( <b>3</b> ) viewed down the: (b) <i>a</i> -axis; (c) <i>b</i> -axis, and (d) <i>c</i> -axis. Non-coordinated methanol molecules are presented in the spacefill style. Hydrogen bonds are highlightes as yellow dashed lines..... | 18 |
| <b>Table S3.</b> Selected bond lengths, angles and hydrogen bond parameters in the crystal structure of $[VO(L^3)(OEt)(H_2O)]$ ( <b>5</b> ).....                                                                                                                                                                                                                                    | 19 |
| <b>Figure S16.</b> Crystal packing in $[VO(L^3)(OEt)(H_2O)]$ ( <b>5</b> ) viewed down the: (a) <i>a</i> -axis; (b) <i>b</i> -axis, and (c) <i>c</i> -axis. Hydrogen bonds are highlightes as yellow dashed lines. ....                                                                                                                                                              | 21 |
| <b>Table S4.</b> Selected bond lengths, angles and hydrogen bond parameters in the crystal structure of $(NH_4)[VO_2(L^1)]$ ( <b>1</b> ).....                                                                                                                                                                                                                                       | 22 |
| <b>Figure S17.</b> Crystal packing in $(NH_4)[VO_2(L^1)]$ ( <b>1</b> ) viewed down the: (a) <i>a</i> -axis; (b) <i>b</i> -axis, and (c) <i>c</i> -axis. Hydrogen bonds are highlightes as yellow dashed lines. ....                                                                                                                                                                 | 24 |
| <b>Table S5.</b> Selected bond lengths, angles and hydrogen bond parameters in the crystal structure of $[VO(L^1)(OMe)(MeOH)]$ ( <b>2</b> ).....                                                                                                                                                                                                                                    | 25 |
| <b>Figure S18.</b> Crystal packing in $[VO(L^1)(OMe)(MeOH)]$ ( <b>2</b> ) viewed down the: (a) <i>a</i> -axis; (b) <i>b</i> -axis. Hydrogen bonds are highlightes as yellow dashed lines. ....                                                                                                                                                                                      | 27 |

|                                                                                                                                                                                                                                                                                                                                                                                                                                                                                                                                                                                                                                                                                                                                                                                                                                           |    |
|-------------------------------------------------------------------------------------------------------------------------------------------------------------------------------------------------------------------------------------------------------------------------------------------------------------------------------------------------------------------------------------------------------------------------------------------------------------------------------------------------------------------------------------------------------------------------------------------------------------------------------------------------------------------------------------------------------------------------------------------------------------------------------------------------------------------------------------------|----|
| <b>Table S6.</b> Selected bond lengths, angles and hydrogen bond parameters in the crystal structure of $[\text{VO}_2(\text{HL}^3)]_2 \cdot 2\text{H}_2\text{O}$ ( <b>5</b> ) .....                                                                                                                                                                                                                                                                                                                                                                                                                                                                                                                                                                                                                                                       | 28 |
| <b>Figure S19.</b> Supramolecular layers formed in <i>ac</i> -plane in $[\text{VO}_2(\text{HL}^3)]_2 \cdot 2\text{H}_2\text{O}$ ( <b>6</b> ) viewed down the: (a) <i>a</i> -axis; (b) <i>b</i> -axis, (c) <i>c</i> -axis. Hydrogen bonds are highlighted as yellow dashed lines. Hydrogen bonds are highlightes as yellow dashed lines. ....                                                                                                                                                                                                                                                                                                                                                                                                                                                                                              | 30 |
| <b>Figure S20.</b> Crystal packing in $[\text{VO}_2(\text{HL}^3)]_2 \cdot 2\text{H}_2\text{O}$ ( <b>6</b> ) viewed down the: (a) <i>a</i> -axis; (b) <i>c</i> -axis. Crystal water molecules are highlighted in spacefill style. Hydrogen bonds are highlightes as yellow dashed lines. ....                                                                                                                                                                                                                                                                                                                                                                                                                                                                                                                                              | 31 |
| <b>Table S7.</b> Selected bond lengths, angles and hydrogen bond parameters in the crystal structure of $[\text{VO}(\text{L}^3)(\text{OMe})(\text{MeOH})]$ ( <b>7</b> ) .....                                                                                                                                                                                                                                                                                                                                                                                                                                                                                                                                                                                                                                                             | 32 |
| <b>Figure S21.</b> (a) Supramolecular dimers formed through <i>R2210</i> hydrogen bonded motif. Crystal packing in $[\text{VO}(\text{L}^3)(\text{OMe})(\text{MeOH})]$ ( <b>7</b> ) viewed down the: (b) <i>a</i> -axis; (c) <i>b</i> -axis, and (d) <i>c</i> -axis. Non-coordinated methanol molecules are presented in the spacefill style. Hydrogen bonds are highlightes as yellow dashed lines. ....                                                                                                                                                                                                                                                                                                                                                                                                                                  | 34 |
| <b>Figure S22.</b> Temperature-dependent diffraction patterns of $(\text{NH}_4)[\text{VO}_2(\text{L}^1)]$ ( <b>1</b> ).....                                                                                                                                                                                                                                                                                                                                                                                                                                                                                                                                                                                                                                                                                                               | 35 |
| <b>Figure S23.</b> Temperature-dependent diffraction patterns of $[\text{VO}(\text{L}^1)(\text{OMe})(\text{MeOH})]$ ( <b>2</b> ) .....                                                                                                                                                                                                                                                                                                                                                                                                                                                                                                                                                                                                                                                                                                    | 35 |
| <b>Figure S24.</b> Temperature-dependent diffraction patterns of $[\text{VO}_2(\text{HL}^2)]$ ( <b>4</b> ).....                                                                                                                                                                                                                                                                                                                                                                                                                                                                                                                                                                                                                                                                                                                           | 36 |
| <b>Figure S25.</b> Temperature-dependent diffraction patterns of $[\text{VO}(\text{L}^3)(\text{OEt})(\text{H}_2\text{O})]$ ( <b>5</b> ) .....                                                                                                                                                                                                                                                                                                                                                                                                                                                                                                                                                                                                                                                                                             | 36 |
| <b>Figure S26.</b> Temperature-dependent diffraction patterns of $[\text{VO}(\text{L}^3)(\text{OMe})(\text{MeOH})]$ ( <b>7</b> ) .....                                                                                                                                                                                                                                                                                                                                                                                                                                                                                                                                                                                                                                                                                                    | 37 |
| <b>Figure S27.</b> Temperature dependence of refined molar volume of the $(\text{NH}_4)[\text{VO}_2(\text{L}^1)]$ ( <b>1</b> ) compound, which is calculated as $18V_{\text{cell}}$ . Vertical bars represent standard uncertainty. Due to poor crystallinity of the compound, and consequently low diffraction data quality, the molar volume could not be refined precisely, but the overall change across the whole temperature range is insignificant - around 2%. However, above 160 °C the sample converts to another phase with similar unit cell parameters.....                                                                                                                                                                                                                                                                  | 37 |
| <b>Figure S28.</b> (Top) Temperature dependence of refined molar volume of the $[\text{VO}(\text{L}^1)(\text{OMe})(\text{MeOH})]$ ( <b>2</b> ) compound, which is calculated as $14V_{\text{cell}}$ below 160 °C, and $18V_{\text{cell}}$ above it. Standard uncertainties are very low, and not visible in the graph. At low temperatures the molar volume corresponds to the $\text{VO}(\text{L})$ moiety ligated with methoxy/methanol ligands. Above 110 °C the change in molar volume corresponds to the loss of two methanol molecules per moiety (ca. $100 \text{ \AA}^3$ as calculated from methanol crystal structure). (Bottom) Above 160 °C sample probably converts to $[\text{VO}_2(\text{HL}^1)]$ , the same phase observed in high temperature PXRD patterns of $(\text{NH}_4)[\text{VO}_2(\text{L}^1)]$ ( <b>1</b> )..... | 38 |
| <b>Figure S29.</b> Temperature dependence of refined molar volume of the $[\text{VO}_2(\text{HL}^2)]$ ( <b>4</b> ) compound, which is calculated as $14V_{\text{cell}}$ . Vertical bars represent standard uncertainty. Molar volume increases smoothly across the whole temperature range, and the overall change across the whole temperature range is insignificant - around 4%. Partial amorphization begins at around 180 °C, as evidenced by high uncertainty of molar volume at those temperatures.....                                                                                                                                                                                                                                                                                                                            | 39 |
| <b>Figure S30.</b> Temperature dependence of refined molar volume of the $[\text{VO}(\text{L}^3)(\text{OMe})(\text{MeOH})]$ ( <b>7</b> ) compound, which is calculated as $14V_{\text{cell}}$ . Vertical bars represent standard uncertainty. At low temperatures the molar volume corresponds to the $\text{VO}(\text{L})$ moiety ligated with methoxy/methanol ligands. Above 60 °C the change in molar volume corresponds to loss of one methanol molecule per moiety (ca. $50 \text{ \AA}^3$ as calculated from methanol crystal structure). Above 120 °C partial amorphization of the sample prevents precise refinements of molar volume .....                                                                                                                                                                                      | 40 |

|                                                                                                                                                                                                                                                                                                                                                                                                                                                                                                                                                                                                                                                                                                                                                                                                                                                                                   |    |
|-----------------------------------------------------------------------------------------------------------------------------------------------------------------------------------------------------------------------------------------------------------------------------------------------------------------------------------------------------------------------------------------------------------------------------------------------------------------------------------------------------------------------------------------------------------------------------------------------------------------------------------------------------------------------------------------------------------------------------------------------------------------------------------------------------------------------------------------------------------------------------------|----|
| <b>Figure S31.</b> Examples of le Bail refinement on temperature-dependent PXRD data of [VO(L <sup>1</sup> )(OMe)(MeOH)] ( <b>2</b> ), at (a) 30 °C using unit cell parameters of [VO(L <sup>1</sup> )(OMe)(MeOH)], (b) 140 °C, unit cell parameters of intermediate phase: $a = 13.310(3) \text{ \AA}$ , $b = 9.9181(17) \text{ \AA}$ , $c = 8.6416(14) \text{ \AA}$ , $\alpha = 100.751(18)^\circ$ , $\beta = 108.367(10)^\circ$ , $\gamma = 101.710(17)^\circ$ , (c) 200 °C, unit cell parameters of [VO <sub>2</sub> (HL <sup>1</sup> )], $a = 15.2143(15) \text{ \AA}$ , $b = 12.8189(13) \text{ \AA}$ , $c = 9.7818(11) \text{ \AA}$ , $\alpha = 107.074(10)^\circ$ , $\beta = 93.985(11)^\circ$ , $\gamma = 93.584(9)^\circ$ . The refinement results for (c) are similar to high temperature phase of (NH <sub>4</sub> )[VO <sub>2</sub> (L <sup>1</sup> )] results. .... | 41 |
| <b>Figure S32.</b> Example of le Bail refinement on temperature-dependent PXRD data of [VO <sub>2</sub> (HL <sup>2</sup> )] ( <b>4</b> ), at 30 °C using unit cell parameters of [VO <sub>2</sub> (HL <sup>2</sup> )] ( <b>4</b> ). .....                                                                                                                                                                                                                                                                                                                                                                                                                                                                                                                                                                                                                                         | 42 |
| <b>Figure S33.</b> Example of le Bail refinement on temperature-dependent PXRD data of [VO(L <sup>3</sup> )(OEt)(H <sub>2</sub> O)] ( <b>5</b> ), at 30 °C using cell parameters of [VO(L <sup>3</sup> )(OEt)(H <sub>2</sub> O)] ( <b>5</b> ). .....                                                                                                                                                                                                                                                                                                                                                                                                                                                                                                                                                                                                                              | 42 |
| <b>Figure S34.</b> Examples of le Bail refinement on temperature-dependent PXRD data of [VO(L <sup>3</sup> )(OMe)(MeOH)] ( <b>7</b> ), at (a) 30 °C using unit cell parameters of [VO(L <sup>3</sup> )(OMe)(MeOH)] ( <b>7</b> ), (b) 100 °C, unit cell parameters of high-temperature phase: $a = 14.532(3) \text{ \AA}$ , $b = 12.726(3) \text{ \AA}$ , $c = 7.0829(10) \text{ \AA}$ , $\alpha = \gamma = 90^\circ$ , $\beta = 92.019(9)^\circ$ . .....                                                                                                                                                                                                                                                                                                                                                                                                                          | 43 |
| <b>Table S8.</b> Tabulated weighted residual ( $R_{wp}$ ) and unit cell parameters refined by le Bail fit from temperature-dependent PXRD data. ....                                                                                                                                                                                                                                                                                                                                                                                                                                                                                                                                                                                                                                                                                                                              | 44 |
| <b>Fig S35.</b> Complex impedance spectra for <b>complex 1</b> at various temperatures in heating/cooling run. The colored open circles denote experimental values, whereas the solid red line corresponds to the best fit. The corresponding equivalent circuit model is composed of parallel combinations of the resistor (R) and the constant-phase element (CPE), used for fitting the data of individual spectra....                                                                                                                                                                                                                                                                                                                                                                                                                                                         | 47 |
| <b>Fig S36.</b> Complex impedance spectra for <b>complex 4</b> (a,b) and <b>complex 6</b> (c), at various temperatures in heating/cooling run. The colored open circles denote experimental values, whereas the solid red line corresponds to the best fit. The corresponding equivalent circuit model is composed of parallel combinations of the resistor (R) and the constant-phase element (CPE), used for fitting the data of individual spectra.....                                                                                                                                                                                                                                                                                                                                                                                                                        | 47 |
| <b>Figure S37.</b> Conductivity spectra for mononuclear VO(L <sup>1</sup> )(OMe)(MeOH)] sample ( <b>complex 2</b> ) in heating (a) and cooling (b) runs, and (c) temperature dependence of DC conductivity ( $\log(\sigma_{DC})$ vs. 1000/T) for both runs (red circle—heating, blue circle—cooling).....                                                                                                                                                                                                                                                                                                                                                                                                                                                                                                                                                                         | 48 |
| <b>Figure S38.</b> Conductivity spectra for mononuclear [VO <sub>2</sub> (HL <sup>2</sup> )] sample ( <b>complex 4</b> ) in heating (a) and cooling (b) runs, and (c) temperature dependence of DC conductivity ( $\log(\sigma_{DC})$ vs. 1000/T) for both runs (red circle—heating, blue circle—cooling). .....                                                                                                                                                                                                                                                                                                                                                                                                                                                                                                                                                                  | 48 |
| <b>Figure S39.</b> Conductivity spectra for mononuclear [VO(L <sup>3</sup> )(OMe)(MeOH)] sample ( <b>complex 7</b> ) in heating (a) and cooling (b) runs, and (c) temperature dependence of DC conductivity ( $\log(\sigma_{DC})$ vs. 1000/T) for both runs (red circle—heating, blue circle—cooling).....                                                                                                                                                                                                                                                                                                                                                                                                                                                                                                                                                                        | 48 |



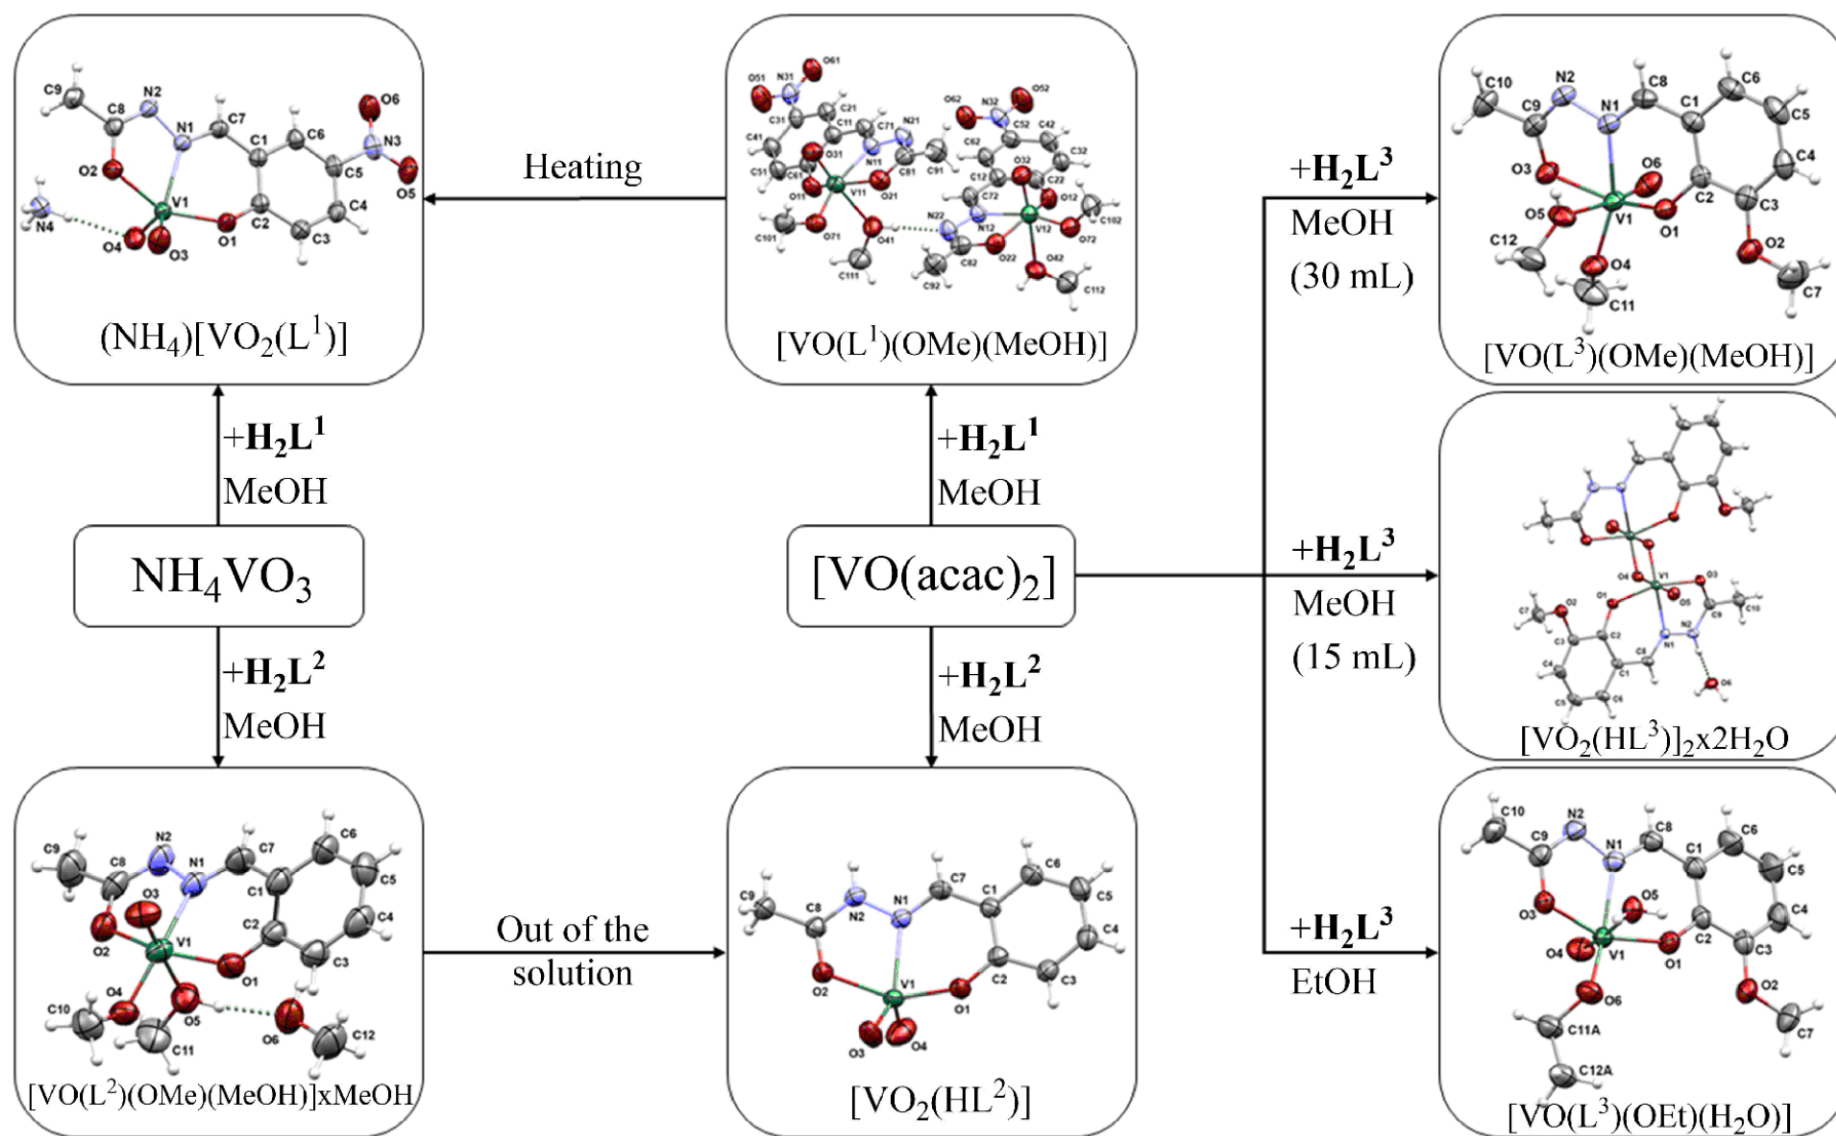

Scheme S1. Vanadium coordination complexes - synthetic pathways.

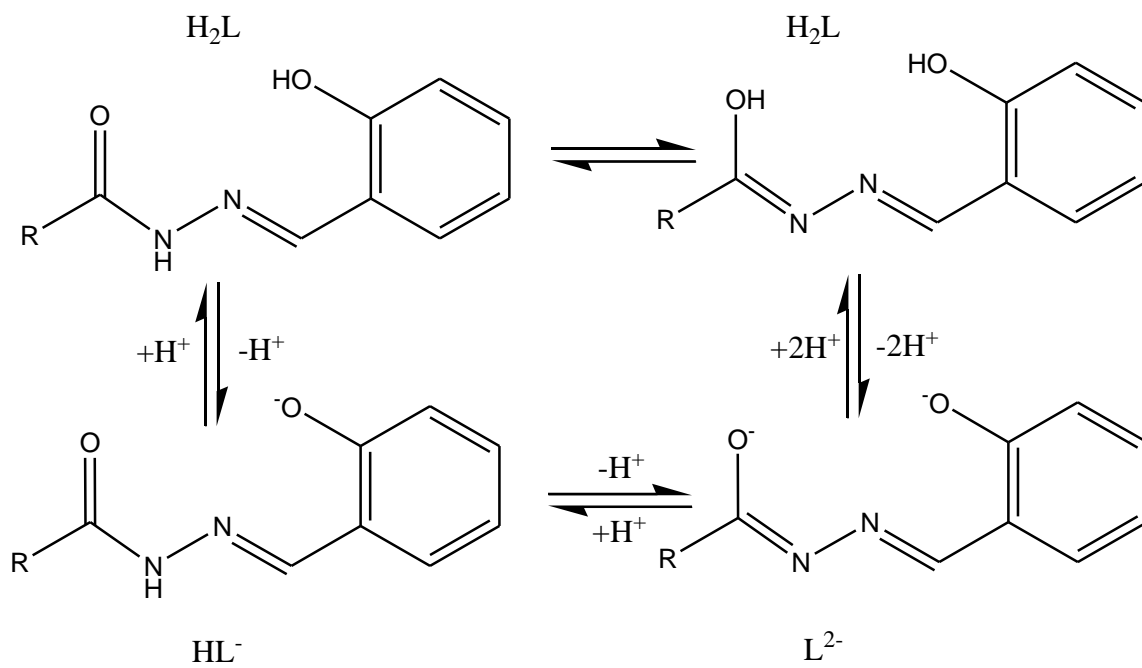

**Scheme S2.** Hydrazidato =N–NH–(C=O)– and hydrazone =N=N–(C–O)– ligand forms and reversible deprotonation

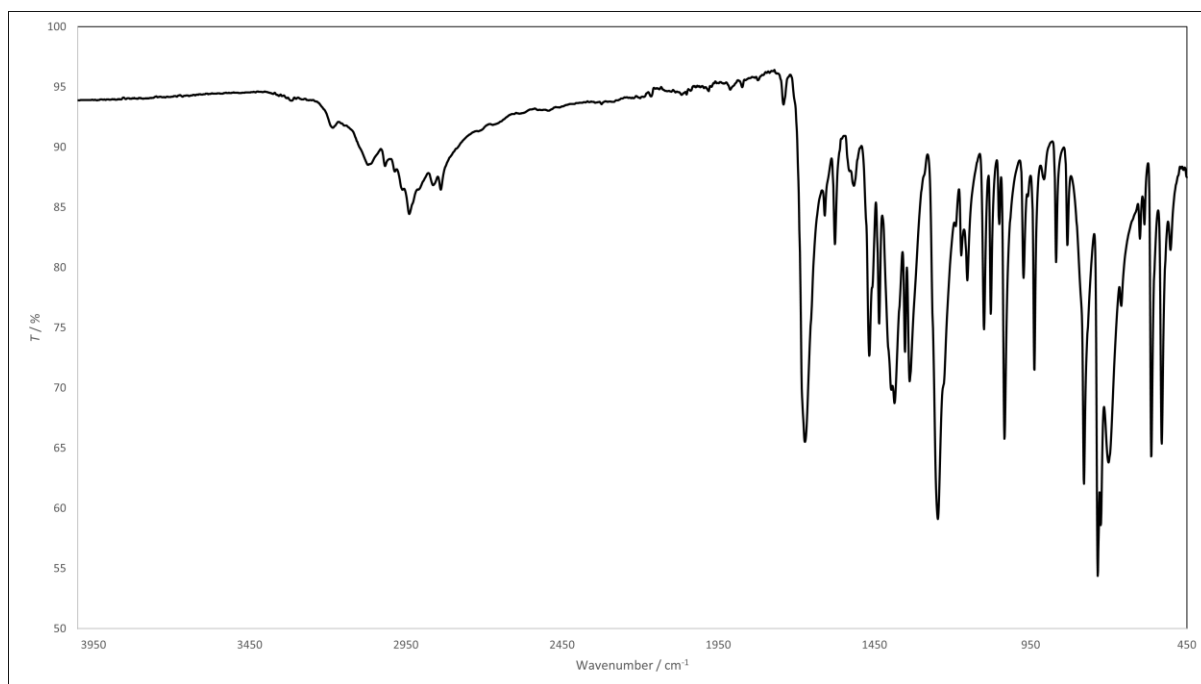

Figure S1. IR-ATR ligand spectra  $H_2L^3$

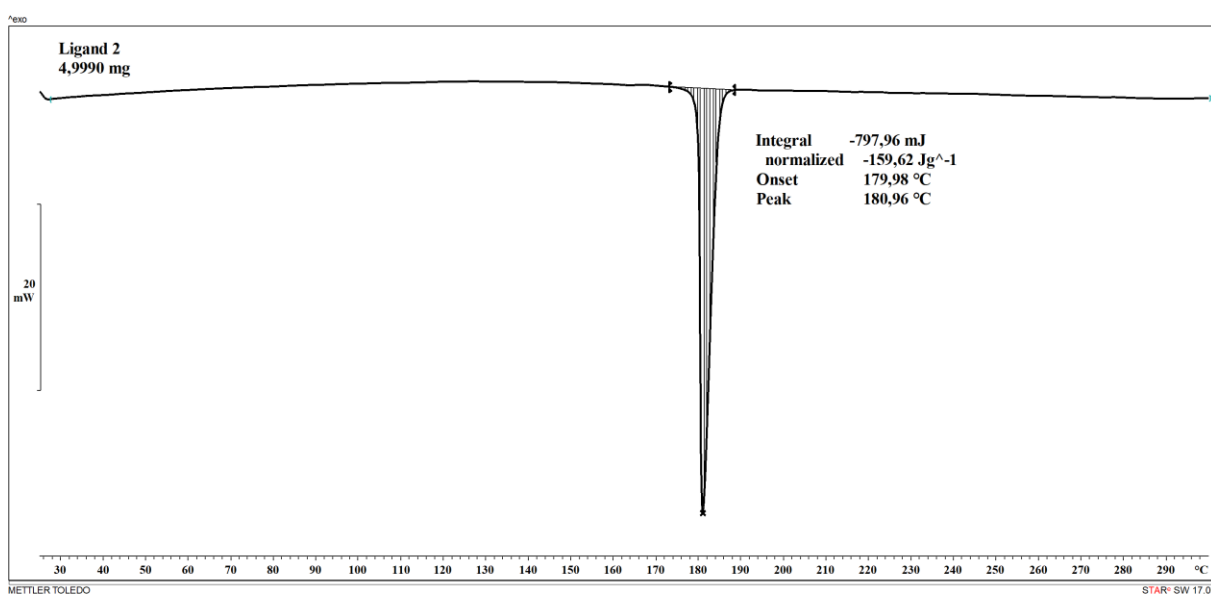

Figure S2. DSC curve for the ligand  $H_2L^3$

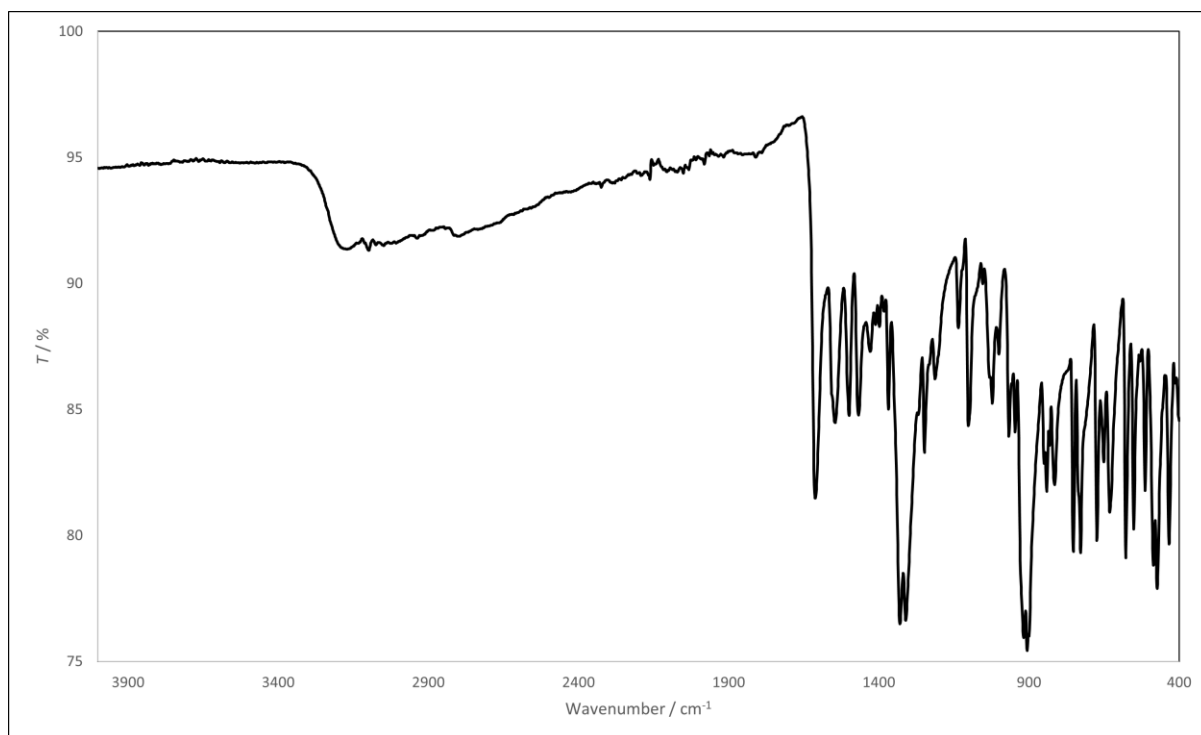

**Figure S3.** IR-ATR spectra for the complex  $(\text{NH}_4)[\text{VO}_2(\text{L}^1)]$  (**1**)

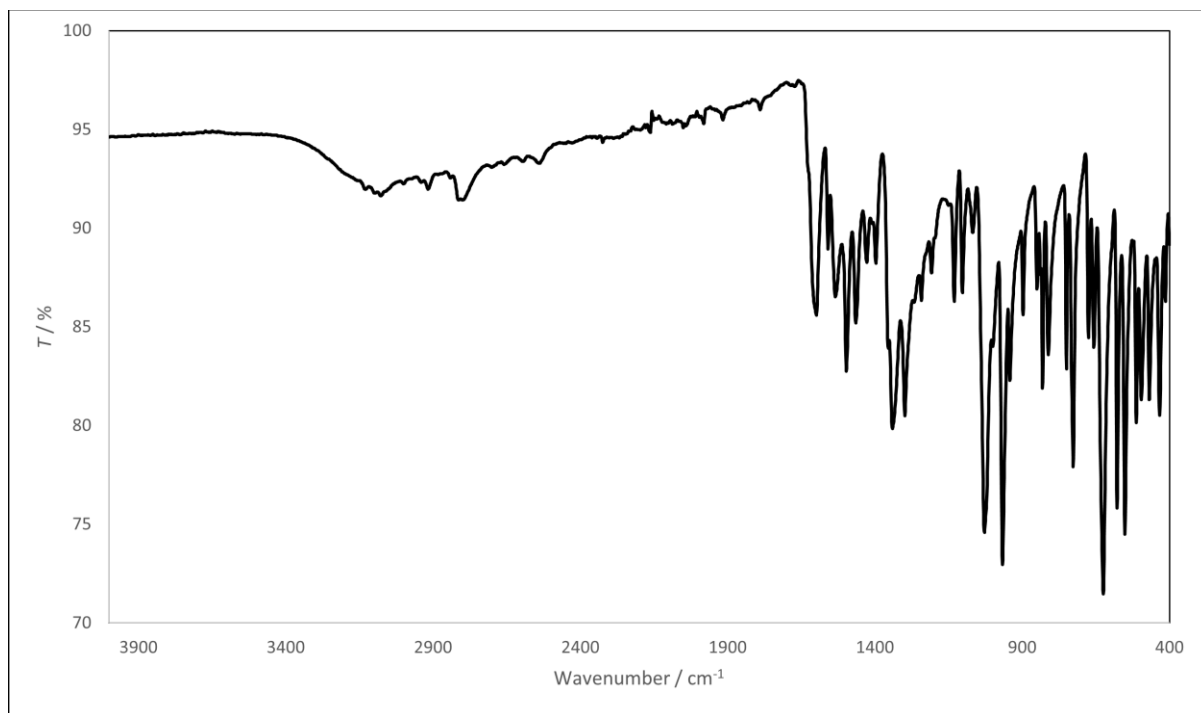

**Figure S4.** IR-ATR spectra for the complex  $[\text{VO}(\text{L}^1)(\text{OMe})(\text{MeOH})]$  (**2**)

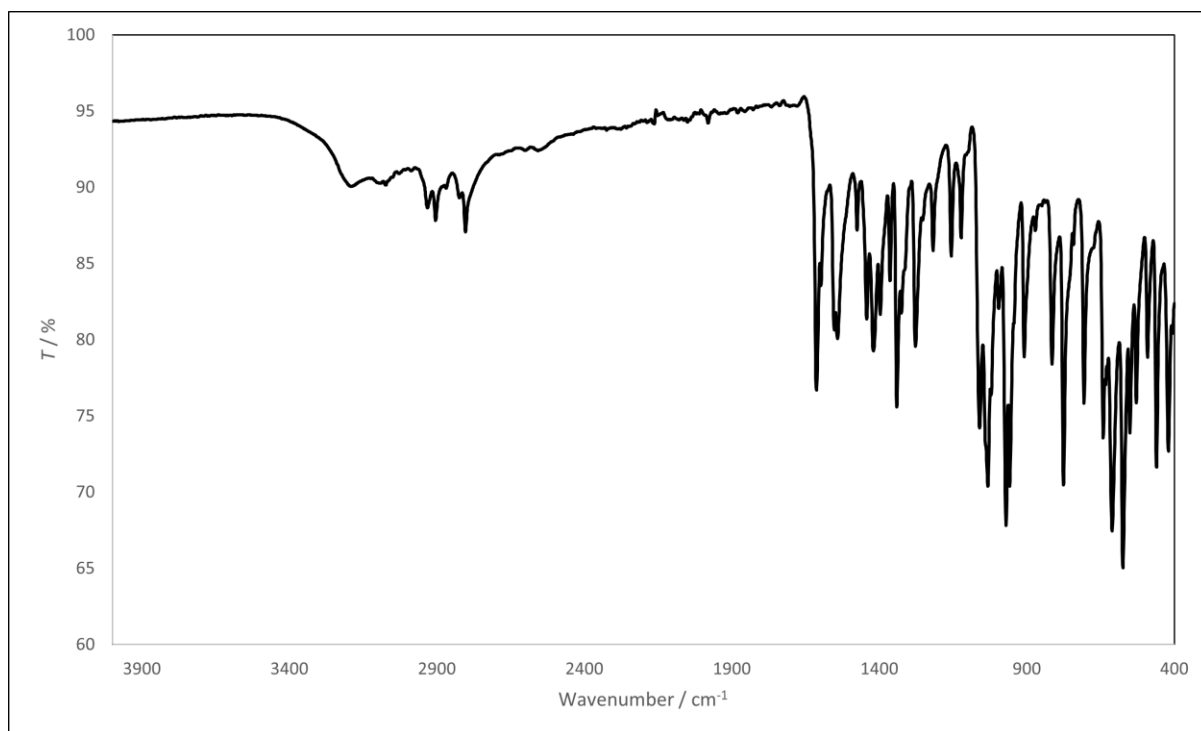

**Figure S5.** IR-ATR spectra for the complex  $[\text{VO}_2(\text{HL}^2)]$  (**4**)

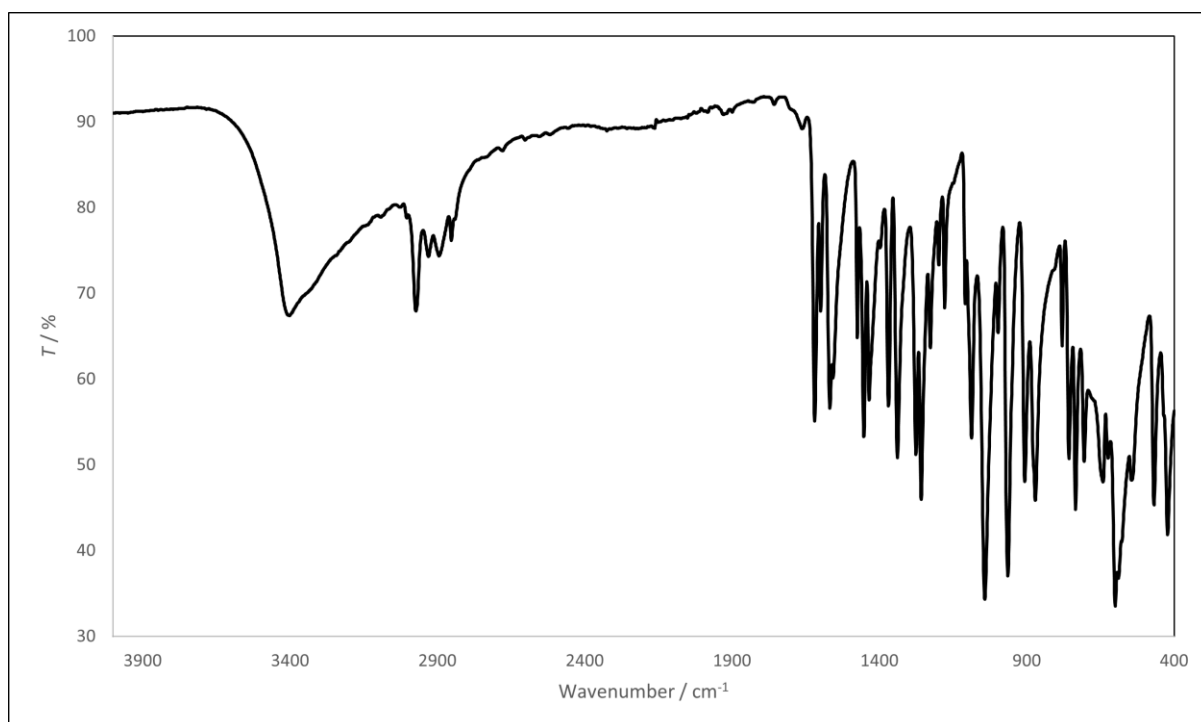

**Figure S6.** IR-ATR spectra for the complex  $[\text{VO}(\text{L}^3)(\text{OEt})(\text{H}_2\text{O})]$  (**5**)

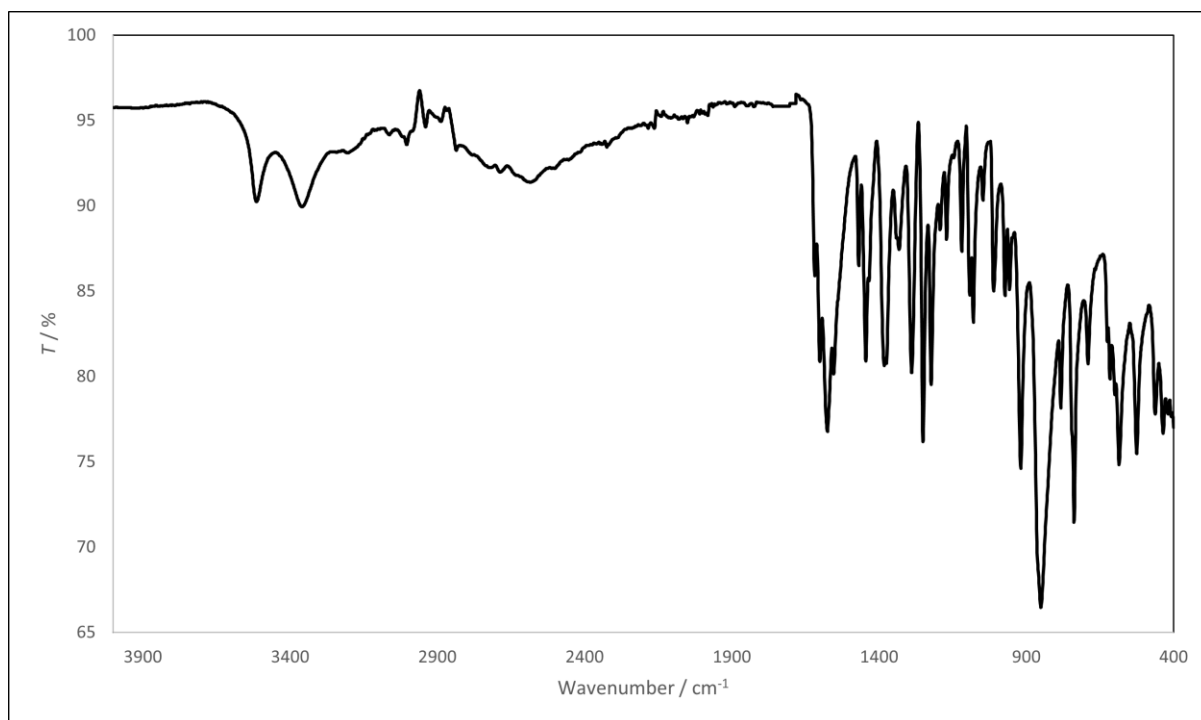

**Figure S7.** IR-ATR spectra for the complex  $[\text{VO}_2(\text{HL}^3)]_2 \cdot 2\text{H}_2\text{O}$  (6)

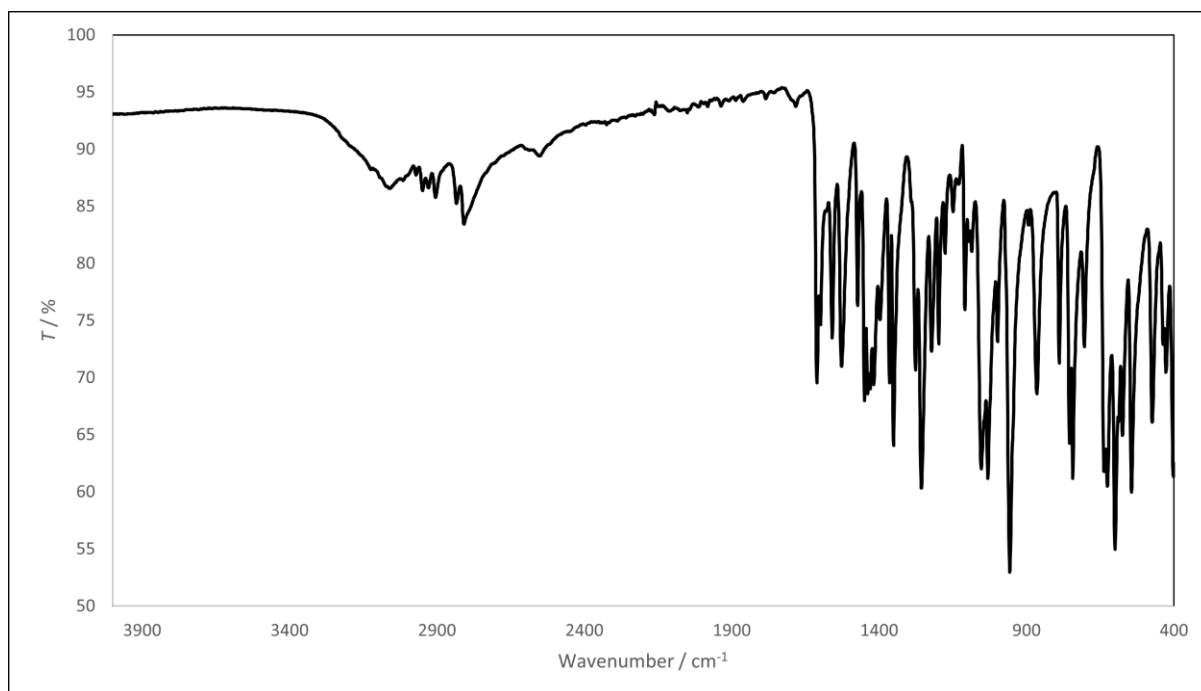

**Figure S8.** IR-ATR spectra for the complex  $[\text{VO}(\text{L}^3)(\text{OMe})(\text{MeOH})]$  (7)

Comparison of IR bands for the obtained vanadium complexes

| Vanadium complex                                              | C-O hydrazone | C=N  | C-O phenyl | V=O      |
|---------------------------------------------------------------|---------------|------|------------|----------|
| $((\text{NH}_4)[\text{VO}_2(\text{L}^1)])$ (1)                | 1330          | 1612 | 1248       | 918, 906 |
| $[\text{VO}(\text{L}^1)(\text{OMe})(\text{MeOH})]$ (2)        | 1341          | 1599 | 1299       | 967      |
| $[\text{VO}_2(\text{HL}^2)]$ (4)                              | 1341          | 1613 | 1276       | 971      |
| $[\text{VO}(\text{L}^3)(\text{OEt})(\text{H}_2\text{O})]$ (5) | 1339          | 1620 | 1259       | 964      |
| $[\text{VO}_2(\text{HL}^3)]_2 \cdot 2\text{H}_2\text{O}$ (6)  | 1332          | 1574 | 1251       | 920      |
| $[\text{VO}(\text{L}_3)(\text{OMe})(\text{MeOH})]$ (7)        | 1351          | 1611 | 1256       | 957      |

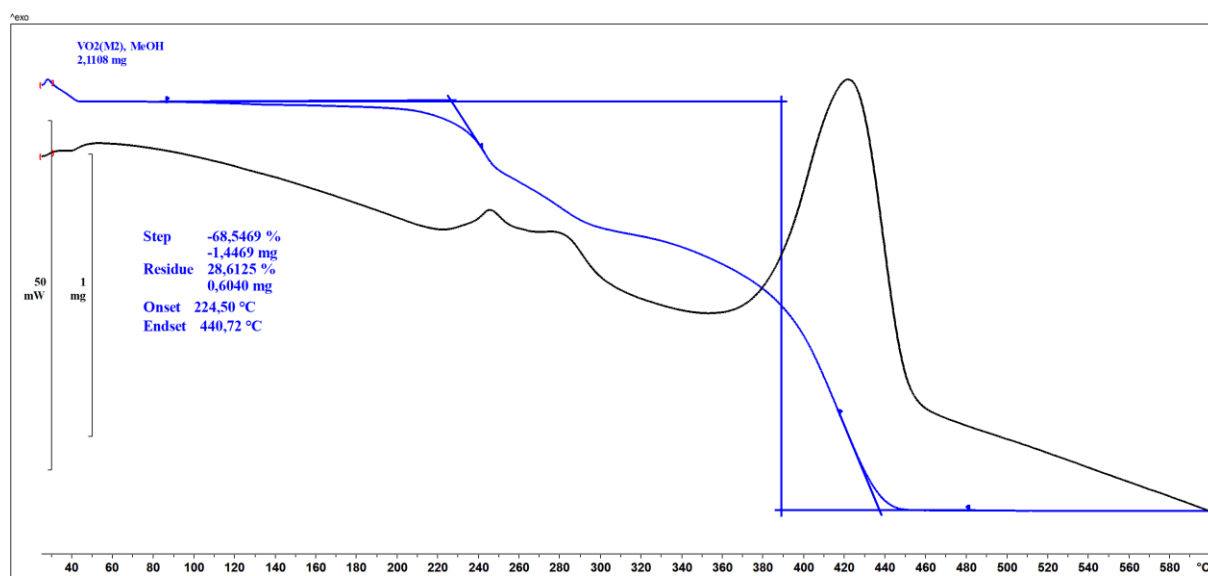

Figure S9. TGA/DSC curve for the complex  $(\text{NH}_4)[\text{VO}_2(\text{L}^1)]$  (1)

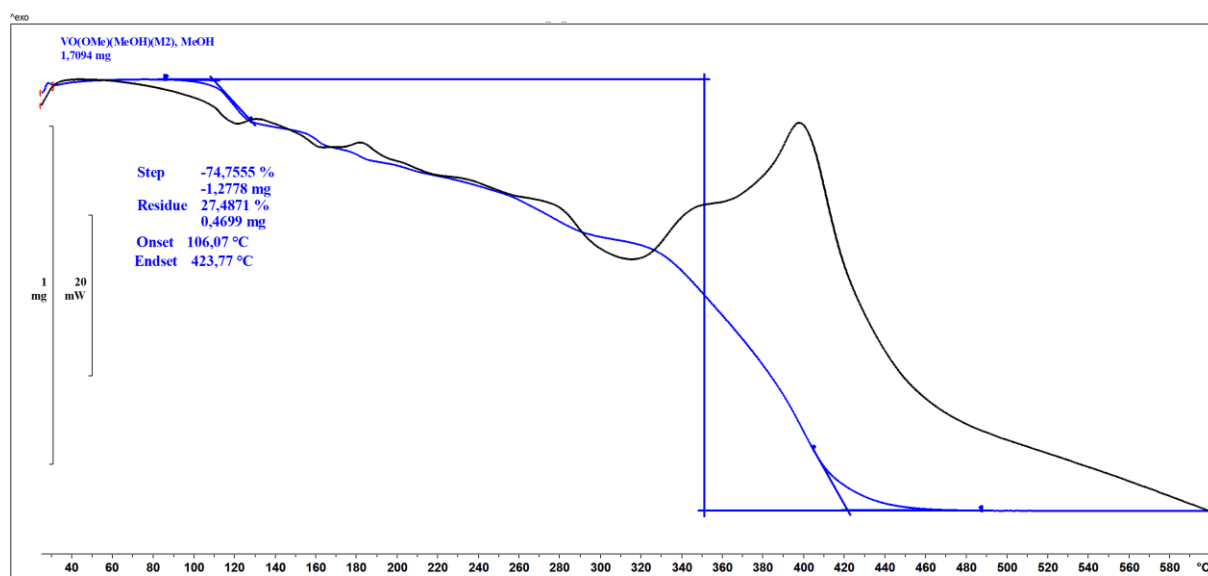

Figure S10. TGA/DSC curve for the complex  $[\text{VO}(\text{L}^1)(\text{OMe})(\text{MeOH})]$  (2)



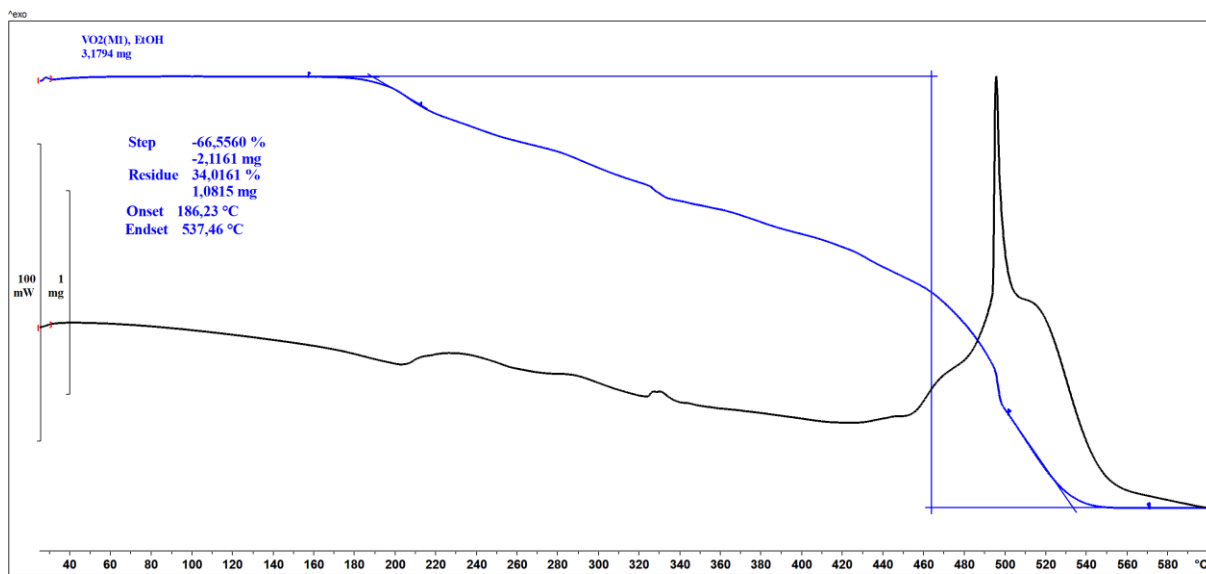

Figure S11. TGA/DSC curve for the complex [VO<sub>2</sub>(HL<sup>2</sup>)] (4)

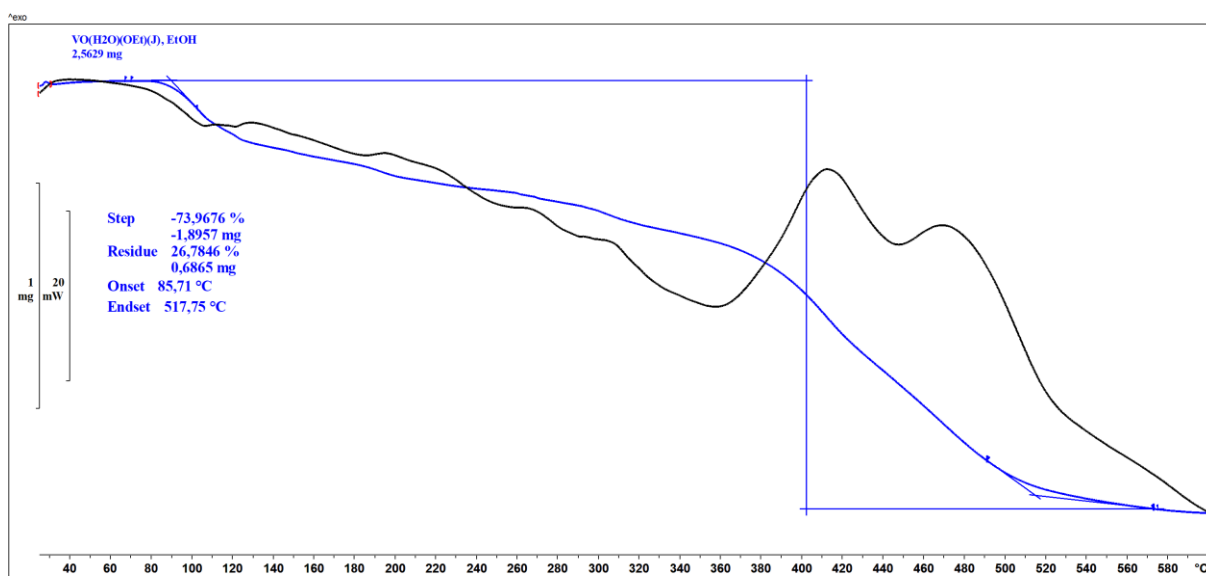

Figure S12. TGA/DSC curve for the complex [VO(L<sup>3</sup>)(OEt)(H<sub>2</sub>O)] (5)

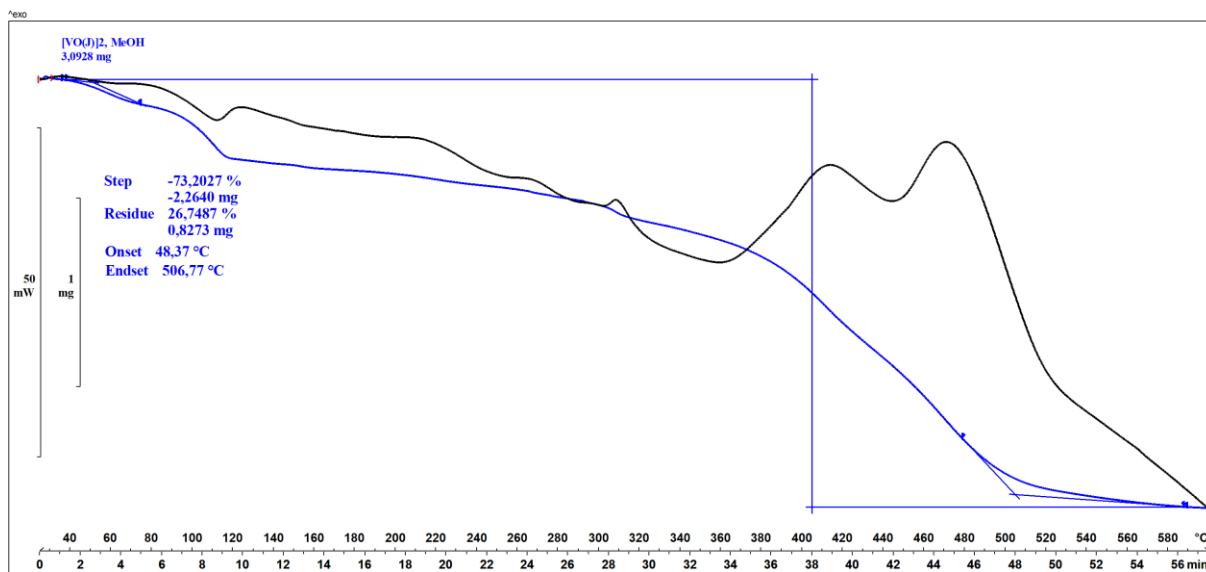

Figure S13. TGA/DSC curve for the complex  $[\text{VO}_2(\text{HL}^3)]_2 \cdot 2\text{H}_2\text{O}$  (6)

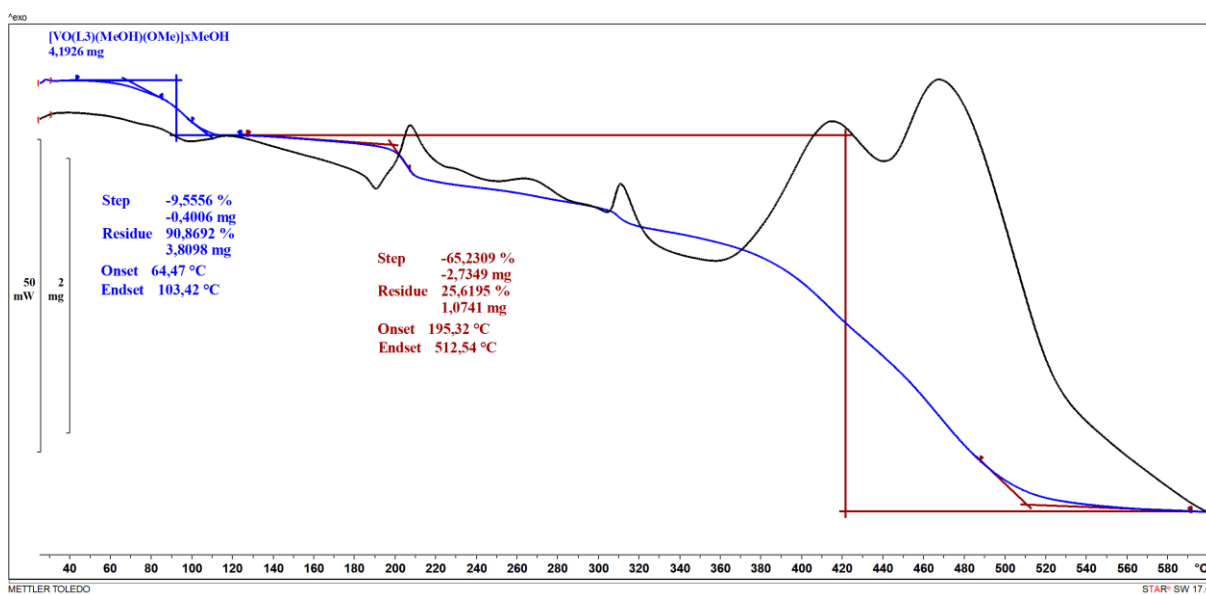

Figure S14. TGA/DSC curve for the complex  $[\text{VO}(\text{L}^3)(\text{OMe})(\text{MeOH})]$  (7)

**Table S1.** Experimental and crystallographic data for compounds (NH<sub>4</sub>)[VO<sub>2</sub>(L<sup>1</sup>)] (1), [VO(L<sup>1</sup>)(OMe)(MeOH)] (2), [VO(L<sup>2</sup>)(OMe)(MeOH)]·MeOH (3), [VO(L<sup>3</sup>)(OEt)(H<sub>2</sub>O)] (5), [VO<sub>2</sub>(HL<sup>3</sup>)]<sub>2</sub>·2H<sub>2</sub>O (6), [VO(L<sup>3</sup>)(OMe)(MeOH)] (7), in this work.

| Identifier                                                             | [VO(L <sup>2</sup> )(OMe)(MeOH)]·MeOH<br>(3)                                 | [VO(L <sup>3</sup> )(OEt)(H <sub>2</sub> O)]<br>(5)                         | (NH <sub>4</sub> )[VO <sub>2</sub> (L <sup>1</sup> )]<br>(1)               | [VO(L <sup>1</sup> )(OMe)(MeOH)]<br>(2)                           | [VO <sub>2</sub> (HL <sup>3</sup> )] <sub>2</sub> ·2H <sub>2</sub> O<br>(6)   | [VO(L <sup>3</sup> )(OMe)(MeOH)]<br>(7)                                    |
|------------------------------------------------------------------------|------------------------------------------------------------------------------|-----------------------------------------------------------------------------|----------------------------------------------------------------------------|-------------------------------------------------------------------|-------------------------------------------------------------------------------|----------------------------------------------------------------------------|
| Empirical formula                                                      | C <sub>12</sub> H <sub>19</sub> N <sub>2</sub> O <sub>6</sub> V              | C <sub>12</sub> H <sub>17</sub> N <sub>2</sub> O <sub>6</sub> V             | C <sub>9</sub> H <sub>11</sub> N <sub>4</sub> O <sub>6</sub> V             | C <sub>11</sub> H <sub>14</sub> N <sub>3</sub> O <sub>7</sub> V   | C <sub>20</sub> H <sub>26</sub> N <sub>4</sub> O <sub>12</sub> V <sub>2</sub> | C <sub>12</sub> H <sub>17</sub> N <sub>2</sub> O <sub>6</sub> V            |
| <i>M<sub>r</sub></i>                                                   | 338.23                                                                       | 336.21                                                                      | 322.16                                                                     | 351.19                                                            | 616.33                                                                        | 336.21                                                                     |
| <i>T</i> /K                                                            | 293(2)                                                                       | 293(2)                                                                      | 293(2)                                                                     | 293(2)                                                            | 293(2)                                                                        | 293(2)                                                                     |
| Crystal system                                                         | triclinic, yellow plate                                                      | monoclinic, brown plate                                                     | triclinic, yellow prism                                                    | triclinic, orange plate                                           | monoclinic, brown plate                                                       | monoclinic, brown prism                                                    |
| Space group                                                            | <i>P</i> −1                                                                  | <i>P</i> 2 <sub>1</sub> / <i>c</i>                                          | <i>P</i> −1                                                                | <i>P</i> −1                                                       | <i>P</i> 2 <sub>1</sub> / <i>c</i>                                            | <i>P</i> 2 <sub>1</sub> / <i>c</i>                                         |
| <i>a</i> /Å                                                            | 7.8576(4)                                                                    | 13.5057(4)                                                                  | 7.5057(2)                                                                  | 7.5799(2)                                                         | 7.41680(6)                                                                    | 8.27200(10)                                                                |
| <i>b</i> /Å                                                            | 10.2578(5)                                                                   | 10.8764(2)                                                                  | 7.8413(2)                                                                  | 11.0971(4)                                                        | 21.95187(16)                                                                  | 11.3736(2)                                                                 |
| <i>c</i> /Å                                                            | 10.7080(5)                                                                   | 11.0038(3)                                                                  | 11.1530(3)                                                                 | 17.8091(5)                                                        | 7.72252(7)                                                                    | 16.1268(3)                                                                 |
| <i>α</i> /°                                                            | 82.970(4)                                                                    | 90                                                                          | 85.945(2)                                                                  | 81.163(2)                                                         | 90                                                                            | 90                                                                         |
| <i>β</i> /°                                                            | 70.374(5)                                                                    | 109.272(3)                                                                  | 86.982(2)                                                                  | 80.369(2)                                                         | 96.0455(8)                                                                    | 95.564(2)                                                                  |
| <i>γ</i> /°                                                            | 74.014(4)                                                                    | 90                                                                          | 68.052(3)                                                                  | 89.964(2)                                                         | 90                                                                            | 90                                                                         |
| <i>V</i> /Å <sup>3</sup>                                               | 781.08(7)                                                                    | 1525.81(7)                                                                  | 607.06(3)                                                                  | 1458.88(8)                                                        | 1250.331(17)                                                                  | 1510.10(4)                                                                 |
| <i>Z</i>                                                               | 2                                                                            | 4                                                                           | 2                                                                          | 4                                                                 | 2                                                                             | 4                                                                          |
| <i>ρ</i> <sub>calc</sub> /g cm <sup>−3</sup>                           | 1.438                                                                        | 1.464                                                                       | 1.762                                                                      | 1.599                                                             | 1.637                                                                         | 1.479                                                                      |
| <i>μ</i> /mm <sup>−1</sup>                                             | 5.572                                                                        | 5.705                                                                       | 7.193                                                                      | 6.072                                                             | 6.903                                                                         | 5.764                                                                      |
| <i>F</i> (000)                                                         | 352                                                                          | 696                                                                         | 328                                                                        | 720                                                               | 632                                                                           | 696.0                                                                      |
| Crystal size/mm <sup>3</sup>                                           | 0.20×0.12×0.10                                                               | 0.23×0.19×0.12                                                              | 0.17×0.14×0.12                                                             | 0.16×0.09×0.04                                                    | 0.32×0.14×0.05                                                                | 0.25 × 0.2 × 0.16                                                          |
| Radiation                                                              | Cu Kα (λ = 1.54184Å)                                                         |                                                                             |                                                                            |                                                                   |                                                                               |                                                                            |
| 2θ range/°                                                             | 8.772 to 134.97                                                              | 6.934 to 157.158                                                            | 7.95 to 155.542                                                            | 5.096 to 157.81                                                   | 8.056 to 155.758                                                              | 9.53 to 155.534                                                            |
| Index ranges                                                           | −9 ≤ <i>h</i> ≤ 9,<br>−12 ≤ <i>k</i> ≤ 12,<br>−12 ≤ <i>l</i> ≤ 10            | −17 ≤ <i>h</i> ≤ 16,<br>−13 ≤ <i>k</i> ≤ 13,<br>−13 ≤ <i>l</i> ≤ 13         | −9 ≤ <i>h</i> ≤ 9,<br>−9 ≤ <i>k</i> ≤ 9,<br>−14 ≤ <i>l</i> ≤ 14            | −9 ≤ <i>h</i> ≤ 9,<br>−13 ≤ <i>k</i> ≤ 14,<br>−22 ≤ <i>l</i> ≤ 22 | −9 ≤ <i>h</i> ≤ 9,<br>−26 ≤ <i>k</i> ≤ 27,<br>−9 ≤ <i>l</i> ≤ 9               | −10 ≤ <i>h</i> ≤ 10, −14 ≤ <i>k</i> ≤ 14,<br>−20 ≤ <i>l</i> ≤ 17           |
| Reflections collected                                                  | 8429                                                                         | 22137                                                                       | 16601                                                                      | 9655                                                              | 23889                                                                         | 16020                                                                      |
| Independent reflections                                                | 2771 [ <i>R</i> <sub>int</sub> = 9.99%, <i>R</i> <sub>sigma</sub> = 19.88 %] | 3220 [ <i>R</i> <sub>int</sub> = 2.97%, <i>R</i> <sub>sigma</sub> = 5.63 %] | 2547 [ <i>R</i> <sub>int</sub> = 1.82%, <i>R</i> <sub>sigma</sub> = 3.1 %] | 9655 [ <i>R</i> <sub>int</sub> = 1.36%]                           | 2664 [ <i>R</i> <sub>int</sub> = 2.03%, <i>R</i> <sub>sigma</sub> = 4.19 %]   | 3148 [ <i>R</i> <sub>int</sub> = 2.94%, <i>R</i> <sub>sigma</sub> = 2.37%] |
| Data/restraints/parameters                                             | 2771/-/199                                                                   | 3220/-/195                                                                  | 2547/-/198                                                                 | 9655/-/412                                                        | 2664/-/187                                                                    | 3148/-/198                                                                 |
| <i>g</i> <sub>1</sub> , <i>g</i> <sub>2</sub> in <i>w</i> <sup>a</sup> | 0.1380, 0                                                                    | 0.0894, 0.8662                                                              | 0.0459, 0.1599                                                             | 0.1306, 0.5466                                                    | 0.0544, 0.2914                                                                | 0.0545, 0.3155                                                             |
| Goodness-of-fit on <i>F</i> <sup>2</sup> , <i>S</i> <sup>b</sup>       | 1.145                                                                        | 1.118                                                                       | 1.102                                                                      | 1.086                                                             | 1.067                                                                         | 1.079                                                                      |

|                                                     |                                    |                                   |                                  |                                   |                                  |                                  |
|-----------------------------------------------------|------------------------------------|-----------------------------------|----------------------------------|-----------------------------------|----------------------------------|----------------------------------|
| Final $R$ and $wR^c$ values [ $I \geq 2\sigma(I)$ ] | $R_1 = 6.99\%$ , $wR_2 = 18.76\%$  | $R_1 = 5.1\%$ , $wR_2 = 14.61\%$  | $R_1 = 2.81\%$ , $wR_2 = 7.89\%$ | $R_1 = 6.57\%$ , $wR_2 = 18.49\%$ | $R_1 = 2.86\%$ , $wR_2 = 8.33\%$ | $R_1 = 0.0312$ , $wR_2 = 0.0881$ |
| Final $R$ and $wR^c$ values [all data]              | $R_1 = 12.38\%$ , $wR_2 = 26.08\%$ | $R_1 = 5.34\%$ , $wR_2 = 14.96\%$ | $R_1 = 2.91\%$ , $wR_2 = 7.96\%$ | $R_1 = 7.7\%$ , $wR_2 = 20.2\%$   | $R_1 = 2.91\%$ , $wR_2 = 8.37\%$ | $R_1 = 0.0326$ , $wR_2 = 0.0897$ |
| Largest diff. peak/hole / e $\text{\AA}^{-3}$       | 0.561/-0.686                       | 0.948/-1.058                      | 0.252/-0.366                     | 0.463/-0.995                      | 0.378/-0.292                     | 0.25/-0.58                       |

$$^a w = 1/[\sigma F_o^2 + (g_1 P)^2 + g_2 P] \text{ where } P = (F_o^2 + 2F_c^2)/3$$

$$^b S = \{\sum[w(F_o^2 - F_c^2)^2]/(N_r - N_p)\}^{1/2} \text{ where } N_r = \text{number of independent reflections, } N_p = \text{number of refined parameters.}$$

$$^c R = \sum | |F_o| - |F_c| | / \sum |F_o|; wR = \{\sum[w(F_o^2 - F_c^2)^2]/\sum[w(F_o^2)^2]\}^{1/2}$$

**Table S2.** Selected bond lengths, angles and hydrogen bond parameters in the crystal structure of [VO(L<sup>2</sup>)(OMe)(MeOH)]·MeOH (**3**)

| Atoms | Bond length/Å | Atoms  | Bond length/Å | Atoms | Bond length/Å |
|-------|---------------|--------|---------------|-------|---------------|
| C1–C2 | 1.399(9)      | O1–C2  | 1.340(7)      | V1–O2 | 1.950(4)      |
| C1–C6 | 1.413(10)     | O2–C8  | 1.316(8)      | V1–O3 | 1.590(5)      |
| C1–C7 | 1.437(9)      | O4–C11 | 1.427(10)     | V1–O4 | 1.784(4)      |
| C2–C3 | 1.391(9)      | O5–C10 | 1.424(10)     | V1–O5 | 2.262(5)      |
| N1–C7 | 1.303(9)      | O5–H5  | 0.86(3)       |       |               |
| N1–N2 | 1.395(8)      | V1–N1  | 2.106(5)      |       |               |
| N2–C8 | 1.288(9)      | V1–O1  | 1.841(4)      |       |               |

| Atoms    | Bond angle/° | Atoms     | Bond angle/° | Atoms    | Bond angle/° |
|----------|--------------|-----------|--------------|----------|--------------|
| C2–C1–C6 | 118.1(6)     | V1–N1–N2  | 116.9(4)     | O2–V1–N1 | 73.94(18)    |
| C2–C1–C7 | 122.5(6)     | N1–N2–C8  | 108.1(5)     | O2–V1–O3 | 99.7(2)      |
| C6–C1–C7 | 119.4(6)     | V1–O1–C2  | 132.7(4)     | O2–V1–O4 | 92.94(18)    |
| C1–C2–C3 | 120.3(6)     | V1–O2–C8  | 118.4(4)     | O2–V1–O5 | 79.8(2)      |
| O1–C2–C1 | 120.4(6)     | V1–O4–C11 | 129.3(5)     | O3–V1–N1 | 93.6(2)      |
| O1–C2–C3 | 119.1(5)     | C10–O5–H5 | 107(2)       | O3–V1–O4 | 101.0(2)     |
| C2–C3–C4 | 119.5(6)     | V1–O5–C10 | 127.5(5)     | O3–V1–O5 | 176.3(2)     |
| C1–C6–C5 | 121.3(7)     | V1–O5–H5  | 120.9(19)    | O4–V1–N1 | 161.9(2)     |
| N1–C7–C1 | 122.8(6)     | O1–V1–N1  | 83.28(19)    | O4–V1–O5 | 82.7(2)      |
| O2–C8–C9 | 116.9(6)     | O1–V1–O2  | 150.6(2)     | O5–V1–N1 | 82.7(2)      |
| O2–C8–N2 | 122.7(6)     | O1–V1–O3  | 100.0(2)     |          |              |
| N2–N1–C7 | 116.0(5)     | O1–V1–O4  | 104.38(19)   |          |              |
| V1–N1–C7 | 126.7(4)     | O1–V1–O5  | 79.2(2)      |          |              |

| D–H···A     | D–H     | H···A   | D···A    | ∠D–H···A | Symmetry code |
|-------------|---------|---------|----------|----------|---------------|
| O5–H5···O6  | 0.86(3) | 1.79(3) | 2.645(7) | 172(6)   | x, y, z       |
| O6–H6A···N2 | 0.82    | 2.02    | 2.829(7) | 169      | 1–x, 1–y, 1–z |
| C5–H5A···O2 | 0.93    | 2.53    | 3.458(9) | 176      | x, –1+y, z    |

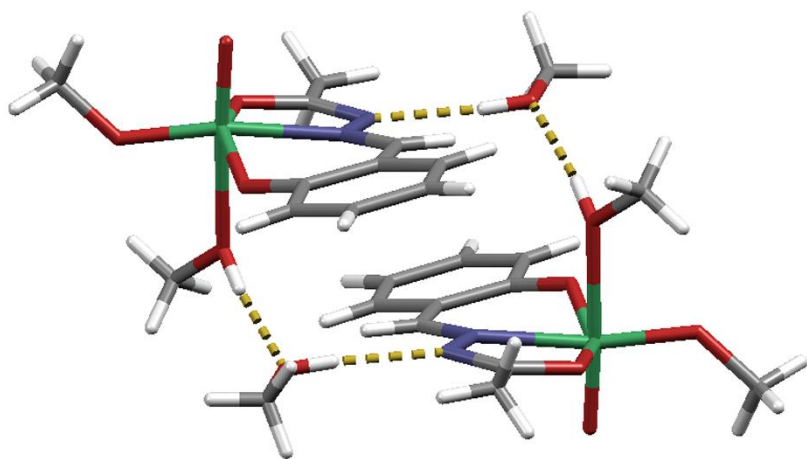

(a)

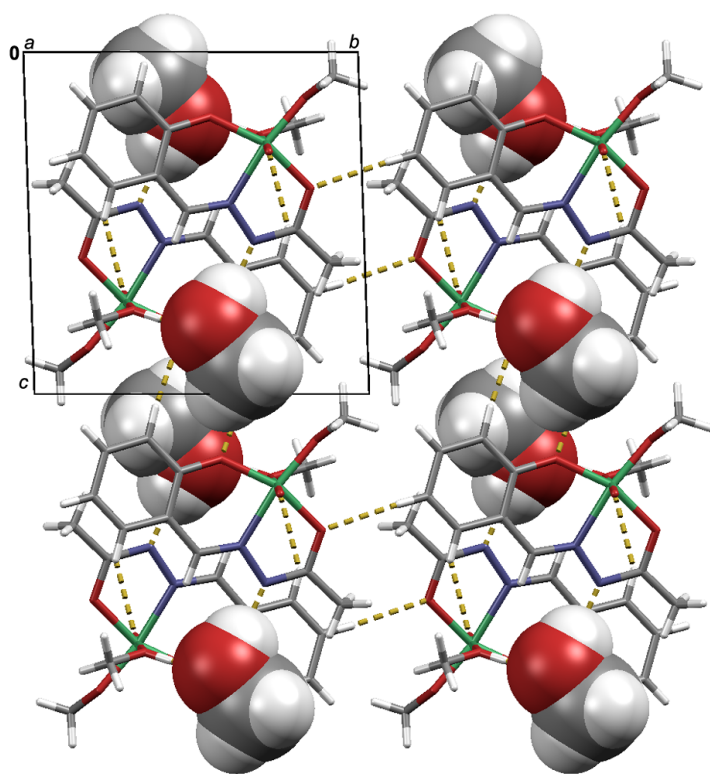

(b)

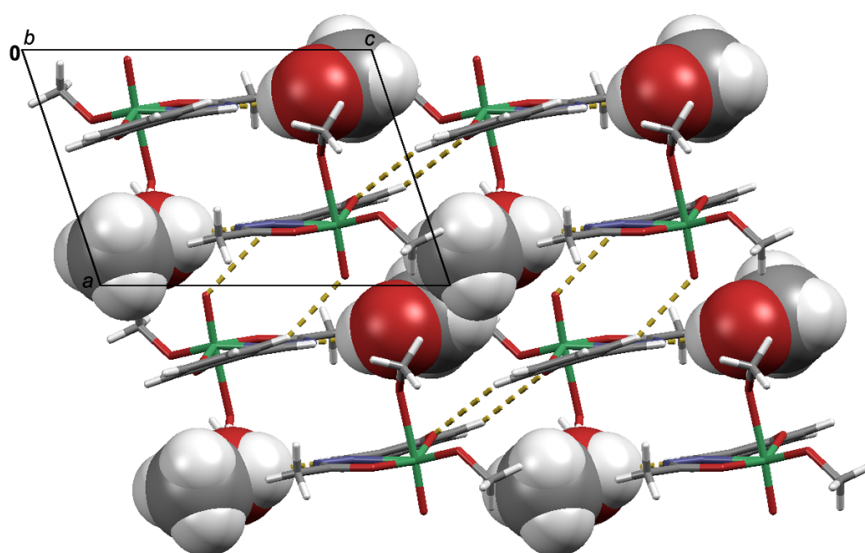

(c)

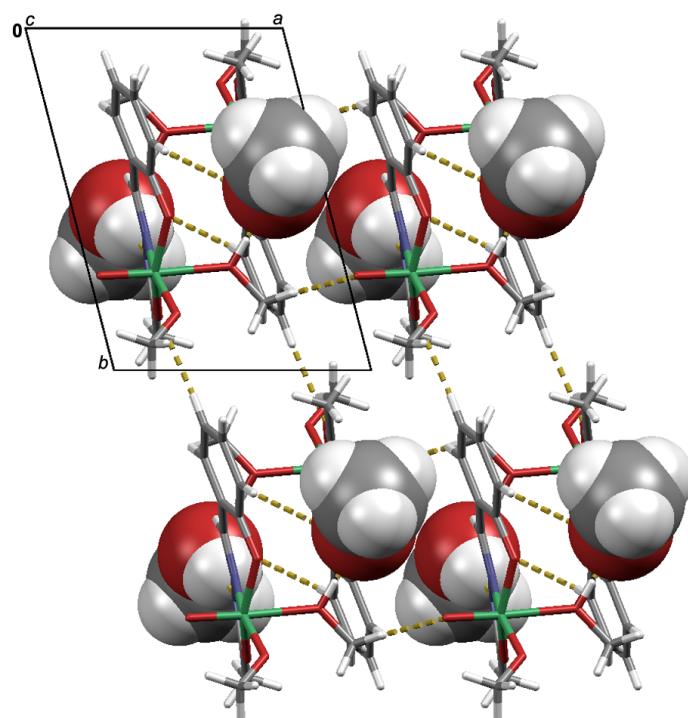

(d)

**Figure S15.** (a) Supramolecular dimers formed through  $R_4^4(14)$  hydrogen bonded motif. Crystal packing in  $[\text{VO}(\text{L}^2)(\text{OMe})(\text{MeOH})]\cdot\text{MeOH}$  (**3**) viewed down the: (b) a-axis; (c) b-axis, and (d) c-axis. Non-coordinated methanol molecules are presented in the spacefill style. Hydrogen bonds are highlighted as yellow dashed lines.



**Table S3.** Selected bond lengths, angles and hydrogen bond parameters in the crystal structure of [VO(L<sup>3</sup>)(OEt)(H<sub>2</sub>O)] (5)

| Atoms  | Bond length/Å | Atoms   | Bond length/Å | Atoms | Bond length/Å |
|--------|---------------|---------|---------------|-------|---------------|
| C1–C2  | 1.395(4)      | N2–C9   | 1.297(4)      | V1–N1 | 2.120(2)      |
| C1–C6  | 1.408(4)      | O1–C2   | 1.334(3)      | V1–O1 | 1.8456(19)    |
| C1–C8  | 1.438(4)      | O3–C9   | 1.303(4)      | V1–O3 | 1.9756(19)    |
| C2–C3  | 1.414(4)      | O5–H5A  | 0.82(3)       | V1–O4 | 1.587(2)      |
| C9–C10 | 1.489(5)      | O5–H5B  | 0.84(3)       | V1–O5 | 2.296(2)      |
| N1–C8  | 1.289(3)      | O6–C11A | 1.474(7)      | V1–O6 | 1.781(2)      |
| N1–N2  | 1.397(3)      | O6–C11B | 1.434(9)      |       |               |

| Atoms        | Bond angle/° | Atoms        | Bond angle/° | Atoms    | Bond angle/° |
|--------------|--------------|--------------|--------------|----------|--------------|
| C2–C1–C6     | 119.7(3)     | O6–C11B–C12B | 110.0(7)     | O1–V1–O4 | 100.95(10)   |
| C2–C1–C8     | 121.9(2)     | N2–N1–C8     | 116.2(2)     | O1–V1–O5 | 81.36(8)     |
| C6–C1–C8     | 118.3(3)     | V1–N1–C8     | 128.19(19)   | O1–V1–O6 | 103.23(9)    |
| C1–C2–C3     | 119.4(2)     | V1–N1–N2     | 115.40(15)   | O3–V1–N1 | 74.36(8)     |
| O1–C2–C1     | 122.3(2)     | N1–N2–C9     | 109.3(2)     | O3–V1–O4 | 96.38(10)    |
| O1–C2–C3     | 118.3(2)     | V1–O1–C2     | 134.83(15)   | O3–V1–O5 | 79.21(7)     |
| C2–C3–C4     | 119.7(3)     | V1–O3–C9     | 117.49(18)   | O3–V1–O6 | 93.00(9)     |
| O2–C3–C2     | 115.3(2)     | H5A–O5–H5B   | 106(3)       | O4–V1–N1 | 94.00(10)    |
| C1–C6–C5     | 120.3(3)     | V1–O5–H5A    | 117(2)       | O4–V1–O5 | 172.97(9)    |
| N1–C8–C1     | 123.6(2)     | V1–O5–H5B    | 116(2)       | O4–V1–O6 | 101.82(12)   |
| N2–C9–C10    | 119.3(3)     | V1–O6–C11A   | 125.0(3)     | O5–V1–N1 | 79.58(8)     |
| O3–C9–C10    | 117.7(3)     | V1–O6–C11B   | 128.5(4)     | O5–V1–O6 | 83.98(10)    |
| O3–C9–N2     | 122.9(3)     | O1–V1–N1     | 84.05(8)     | O6–V1–N1 | 160.83(11)   |
| O6–C11A–C12A | 106.1(5)     | O1–V1–O3     | 153.14(8)    |          |              |

| D–H···A     | D–H     | H···A   | D···A    | ∠D–H···A  | Symmetry code                               |
|-------------|---------|---------|----------|-----------|---------------------------------------------|
| O5–H5A···N2 | 0.82(3) | 1.99(3) | 2.810(3) | 178(3)    | <i>x</i> , 3/2– <i>y</i> , 1/2+ <i>z</i>    |
| O5–H5B···O3 | 0.84(3) | 2.02(3) | 2.850(3) | 176.9(17) | 1– <i>x</i> , 1– <i>y</i> , 1– <i>z</i>     |
| C4–H4···O4  | 0.93    | 2.54    | 3.405(5) | 155       | 2– <i>x</i> , 1/2+ <i>y</i> , 3/2– <i>z</i> |
| C5–H5···O2  | 0.93    | 2.49    | 3.389(4) | 163       | 2– <i>x</i> , 1/2+ <i>y</i> , 3/2– <i>z</i> |

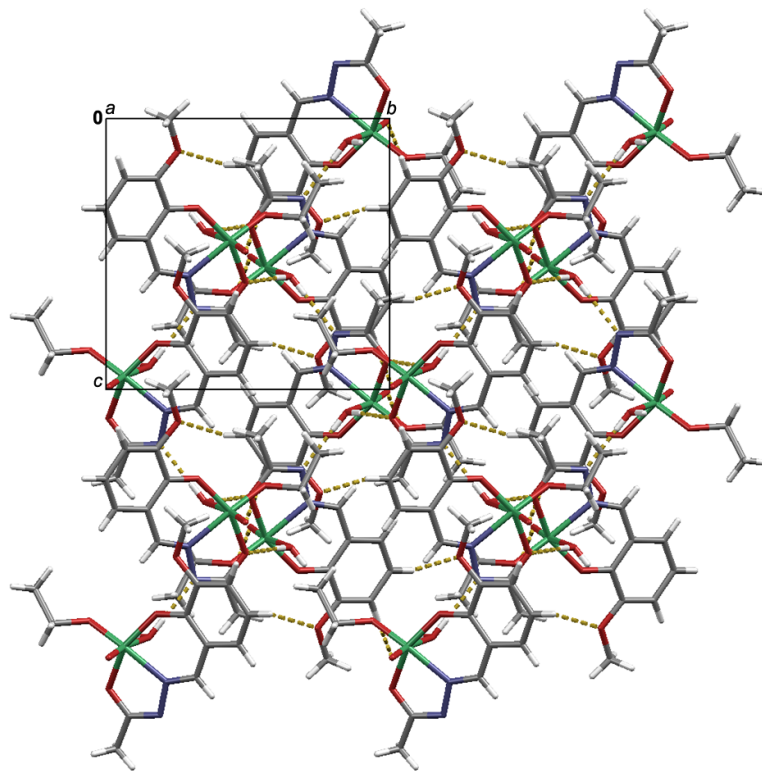

(a)

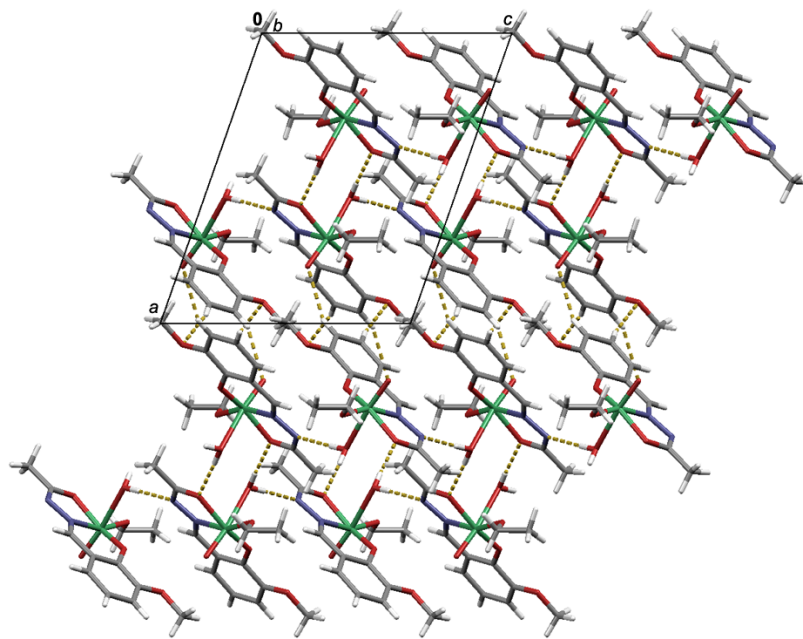

(b)

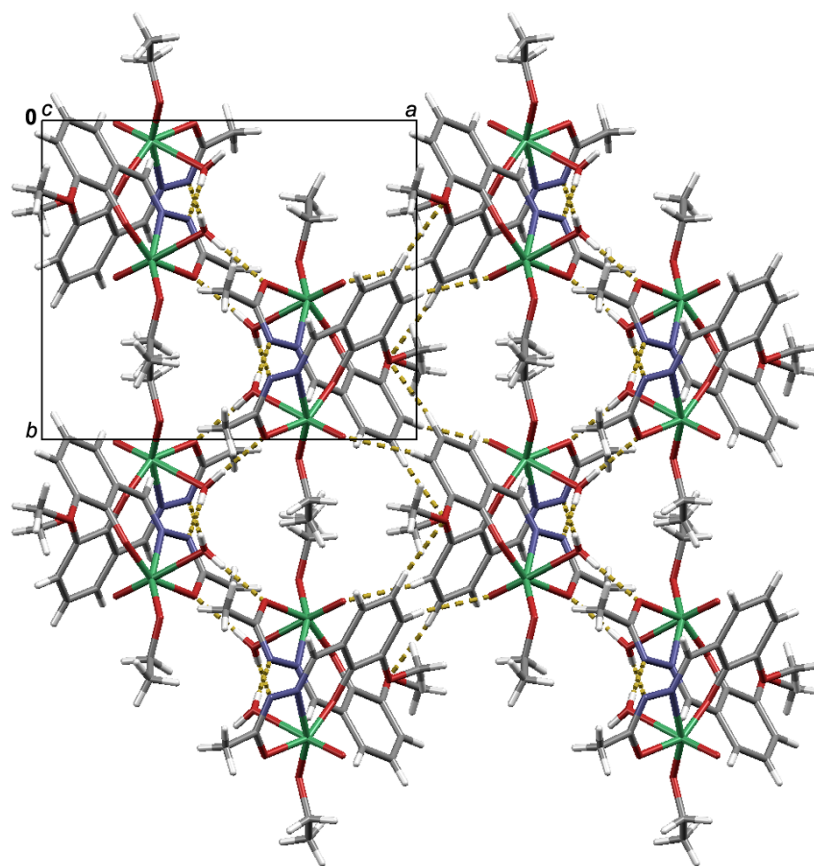

(c)

**Figure S16.** Crystal packing in  $[\text{VO}(\text{L}^3)(\text{OEt})(\text{H}_2\text{O})]$  (**5**) viewed down the: (a)  $a$ -axis; (b)  $b$ -axis, and (c)  $c$ -axis. Hydrogen bonds are highlighted as yellow dashed lines.

**Table S4.** Selected bond lengths, angles and hydrogen bond parameters in the crystal structure of (NH<sub>4</sub>)[VO<sub>2</sub>(L<sup>1</sup>)] (1)

| Atoms | Bond length/Å | Atoms | Bond length/Å | Atoms | Bond length/Å |
|-------|---------------|-------|---------------|-------|---------------|
| C1–C2 | 1.414(2)      | N1–N2 | 1.4086(19)    | V1–O1 | 1.9045(13)    |
| C1–C6 | 1.401(2)      | N2–C8 | 1.301(2)      | V1–O2 | 1.9792(14)    |
| C1–C7 | 1.435(2)      | O1–C2 | 1.309(2)      | V1–O3 | 1.6195(16)    |
| C2–C3 | 1.415(2)      | O2–C8 | 1.301(2)      | V1–O4 | 1.6313(13)    |
| N1–C7 | 1.291(2)      | V1–N1 | 2.1575(15)    |       |               |

| Atoms    | Bond angle/° | Atoms    | Bond angle/° | Atoms    | Bond angle/° |
|----------|--------------|----------|--------------|----------|--------------|
| C2–C1–C6 | 119.70(14)   | O2–C8–N2 | 122.78(15)   | O1–V1–O3 | 97.27(7)     |
| C2–C1–C7 | 121.63(14)   | N2–N1–C7 | 114.73(14)   | O1–V1–O4 | 105.29(6)    |
| C6–C1–C7 | 118.62(14)   | V1–N1–C7 | 129.55(11)   | O2–V1–N1 | 73.16(5)     |
| C1–C2–C3 | 119.07(16)   | V1–N1–N2 | 115.55(10)   | O2–V1–O3 | 90.93(7)     |
| O1–C2–C1 | 122.39(14)   | N1–N2–C8 | 108.72(14)   | O2–V1–O4 | 98.73(6)     |
| O1–C2–C3 | 118.53(16)   | V1–O1–C2 | 137.73(12)   | O3–V1–N1 | 137.50(7)    |
| C2–C3–C4 | 120.84(18)   | V1–O2–C8 | 119.27(11)   | O3–V1–O4 | 109.25(8)    |
| C1–C6–C5 | 119.07(16)   | O1–V1–N1 | 81.72(5)     | O4–V1–N1 | 111.96(7)    |
| N1–C7–C1 | 123.69(15)   | O1–V1–O2 | 150.30(6)    |          |              |

| D–H…A     | D–H     | H…A     | D…A      | ∠D–H…A | Symmetry code         |
|-----------|---------|---------|----------|--------|-----------------------|
| N4–H4A…O4 | 0.86(3) | 2.04(3) | 2.894(2) | 175(2) | <i>x, y, z</i>        |
| N4–H4B…N2 | 0.91(4) | 2.04(4) | 2.942(3) | 172(3) | 1– <i>x, 1–y, 1–z</i> |
| N4–H4C…O5 | 0.85(3) | 2.55(3) | 3.085(3) | 122(3) | –1+ <i>x, y, 1+z</i>  |
| N4–H4D…O2 | 0.86(4) | 2.33(4) | 3.128(3) | 155(3) | – <i>x, 1–y, 1–z</i>  |
| C3–H3…O6  | 0.93    | 2.56    | 3.220(3) | 129    | –1+ <i>x, y, z</i>    |
| C7–H7…O3  | 0.93    | 2.45    | 3.172(2) | 134    | 1+ <i>x, y, z</i>     |

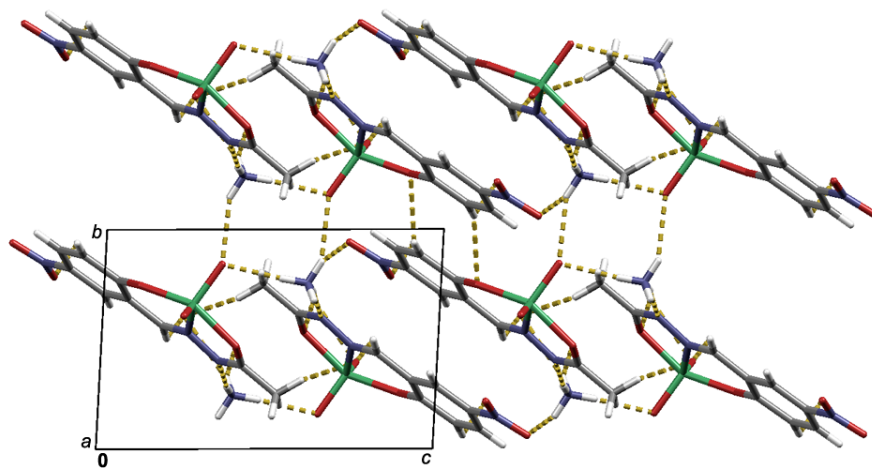

(a)

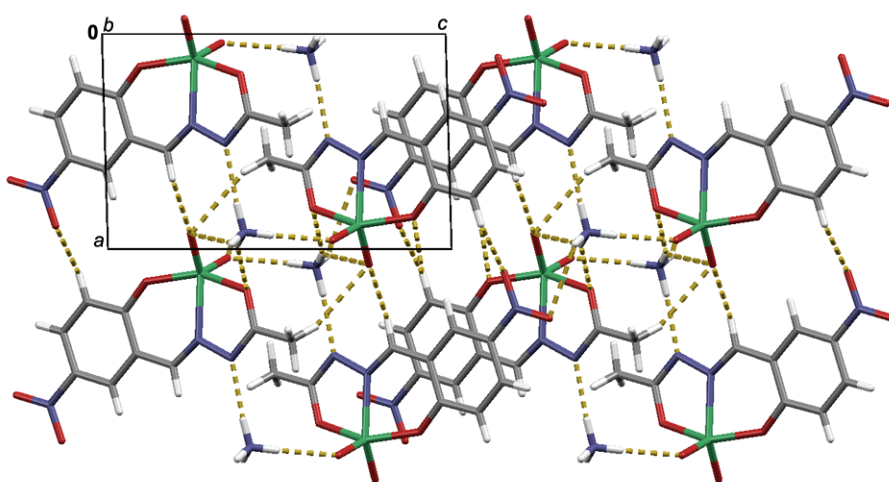

(b)

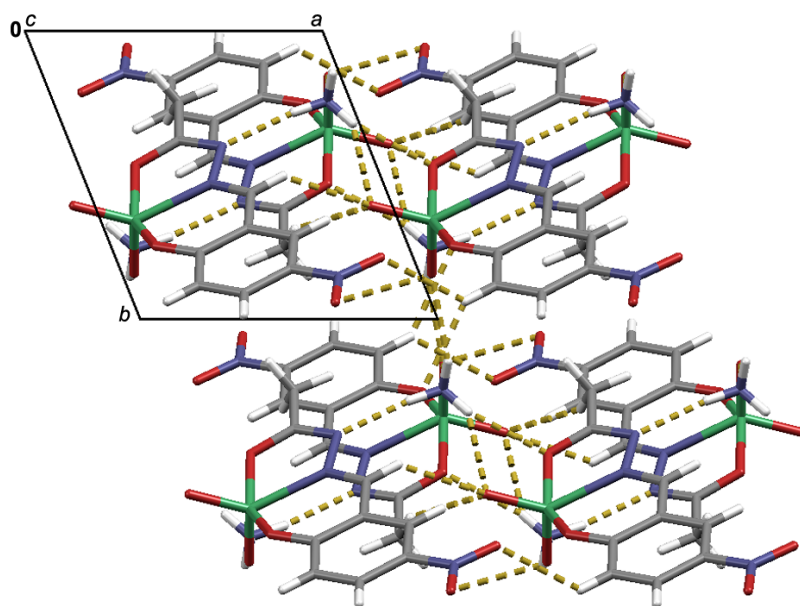

(c)

Figure S17. Crystal packing in  $(\text{NH}_4)[\text{VO}_2(\text{L}^1)]$  (1) viewed down the: (a)  $a$ -axis; (b)  $b$ -axis, and (c)  $c$ -axis. Hydrogen bonds are highlighted as yellow dashed lines.

**Table S5.** Selected bond lengths, angles and hydrogen bond parameters in the crystal structure of  $[\text{VO}(\text{L}^1)(\text{OMe})(\text{MeOH})] (\mathbf{2})$

| Atoms   | Bond length/Å | Atoms    | Bond length/Å | Atoms   | Bond length/Å |
|---------|---------------|----------|---------------|---------|---------------|
| C12–C22 | 1.420(6)      | O11–C21  | 1.323(5)      | V11–O21 | 1.948(3)      |
| C12–C62 | 1.394(5)      | O12–C22  | 1.316(5)      | V11–O31 | 1.584(3)      |
| C12–C72 | 1.436(5)      | O21–C81  | 1.303(6)      | V11–O41 | 2.244(4)      |
| C22–C32 | 1.397(6)      | O22–C82  | 1.309(5)      | V11–O71 | 1.783(3)      |
| C81–C91 | 1.497(8)      | O41–C111 | 1.413(7)      | V12–N12 | 2.146(3)      |
| C82–C92 | 1.472(7)      | O41–H41  | 0.82(4)       | V12–O12 | 1.872(3)      |
| N11–C71 | 1.292(5)      | O42–C112 | 1.403(7)      | V12–O22 | 1.948(3)      |
| N11–N21 | 1.408(5)      | O42–H42  | 0.81(4)       | V12–O32 | 1.582(3)      |
| N12–C72 | 1.283(5)      | O71–C101 | 1.419(6)      | V12–O42 | 2.256(3)      |
| N12–N22 | 1.400(5)      | O72–C102 | 1.434(7)      | V12–O72 | 1.774(3)      |
| N21–C81 | 1.299(6)      | V11–N11  | 2.134(3)      |         |               |
| N22–C82 | 1.302(5)      | V11–O11  | 1.880(3)      |         |               |

| Atoms       | Bond angle/° | Atoms        | Bond angle/° | Atoms       | Bond angle/° |
|-------------|--------------|--------------|--------------|-------------|--------------|
| C21–C11–C61 | 119.0(3)     | V11–N11–C71  | 128.5(3)     | O21–V11–O31 | 98.14(16)    |
| C21–C11–C71 | 122.6(3)     | V11–N11–N21  | 114.5(2)     | O21–V11–O41 | 79.43(13)    |
| C61–C11–C71 | 118.4(3)     | N22–N12–C72  | 116.9(4)     | O21–V11–O71 | 97.16(14)    |
| C22–C12–C62 | 118.7(3)     | V12–N12–C72  | 127.9(3)     | O31–V11–N11 | 92.38(16)    |
| C22–C12–C72 | 122.3(3)     | V12–N12–N22  | 114.9(2)     | O31–V11–O41 | 175.54(16)   |
| C62–C12–C72 | 119.1(3)     | N11–N21–C81  | 109.3(3)     | O31–V11–O71 | 100.20(16)   |
| C11–C21–C31 | 119.7(4)     | N12–N22–C82  | 108.7(3)     | O41–V11–N11 | 83.38(14)    |
| O11–C21–C11 | 122.7(4)     | V11–O11–C21  | 133.9(3)     | O41–V11–O71 | 83.87(14)    |
| O11–C21–C31 | 117.6(4)     | V12–O12–C22  | 134.7(3)     | O71–V11–N11 | 165.93(15)   |
| C12–C22–C32 | 119.6(4)     | V11–O21–C81  | 118.5(3)     | O12–V12–N12 | 83.53(14)    |
| O12–C22–C12 | 122.0(4)     | V12–O22–C82  | 118.3(3)     | O12–V12–O22 | 152.10(14)   |
| O12–C22–C32 | 118.4(4)     | C111–O41–H41 | 110(4)       | O12–V12–O32 | 99.73(16)    |
| C21–C31–C41 | 121.1(4)     | V11–O41–C111 | 125.6(3)     | O12–V12–O42 | 81.45(13)    |
| C22–C32–C42 | 120.6(4)     | V11–O41–H41  | 125(4)       | O12–V12–O72 | 100.95(15)   |
| C11–C61–C51 | 119.5(4)     | C112–O42–H42 | 107(5)       | O22–V12–N12 | 74.43(13)    |
| C12–C62–C52 | 120.7(4)     | V12–O42–C112 | 125.4(3)     | O22–V12–O32 | 98.15(16)    |
| N11–C71–C11 | 122.5(4)     | V12–O42–H42  | 128(4)       | O22–V12–O42 | 79.25(13)    |
| N12–C72–C12 | 123.4(4)     | V11–O71–C101 | 127.3(3)     | O22–V12–O72 | 96.67(15)    |
| N21–C81–C91 | 119.5(4)     | V12–O72–C102 | 128.3(3)     | O32–V12–N12 | 92.52(16)    |
| O21–C81–C91 | 117.7(4)     | O11–V11–N11  | 83.92(14)    | O32–V12–O42 | 175.63(16)   |
| O21–C81–N21 | 122.8(4)     | O11–V11–O21  | 152.68(14)   | O32–V12–O72 | 100.38(16)   |
| N22–C82–C92 | 120.3(4)     | O11–V11–O31  | 99.53(16)    | O42–V12–N12 | 83.42(13)    |
| O22–C82–C92 | 116.5(4)     | O11–V11–O41  | 81.46(13)    | O42–V12–O72 | 83.47(14)    |
| O22–C82–N22 | 123.3(4)     | O11–V11–O71  | 100.02(15)   | O72–V12–N12 | 165.34(15)   |
| N21–N11–C71 | 116.8(3)     | O21–V11–N11  | 74.66(13)    |             |              |



| D-H...A         | D-H     | H...A   | D...A    | $\angle$ D-H...A | Symmetry code  |
|-----------------|---------|---------|----------|------------------|----------------|
| O41-H41...N22   | 0.82(4) | 1.95(4) | 2.770(5) | 175(5)           | $x, y, z$      |
| O42-H42...N21   | 0.81(4) | 1.98(5) | 2.776(5) | 168(7)           | $1+x, y, z$    |
| C102-H10F...O31 | 0.96    | 2.58    | 3.474(7) | 155              | $1+x, -1+y, z$ |
| C41-H41A...O62  | 0.93    | 2.46    | 3.126(7) | 129              | $-x, 1-y, 1-z$ |
| C42-H42A...O61  | 0.93    | 2.46    | 3.126(7) | 128              | $-x, -y, 1-z$  |
| C71-H71...O52   | 0.93    | 2.58    | 3.435(6) | 153              | $-x, -y, 1-z$  |
| C72-H72...O51   | 0.93    | 2.57    | 3.426(6) | 154              | $-x, 1-y, 1-z$ |

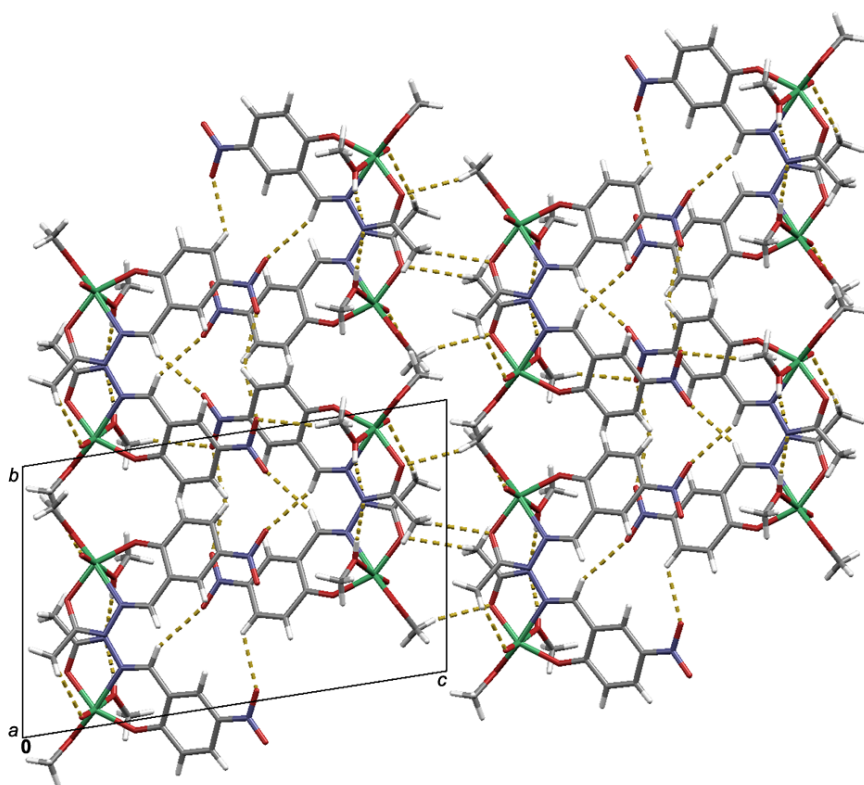

(a)

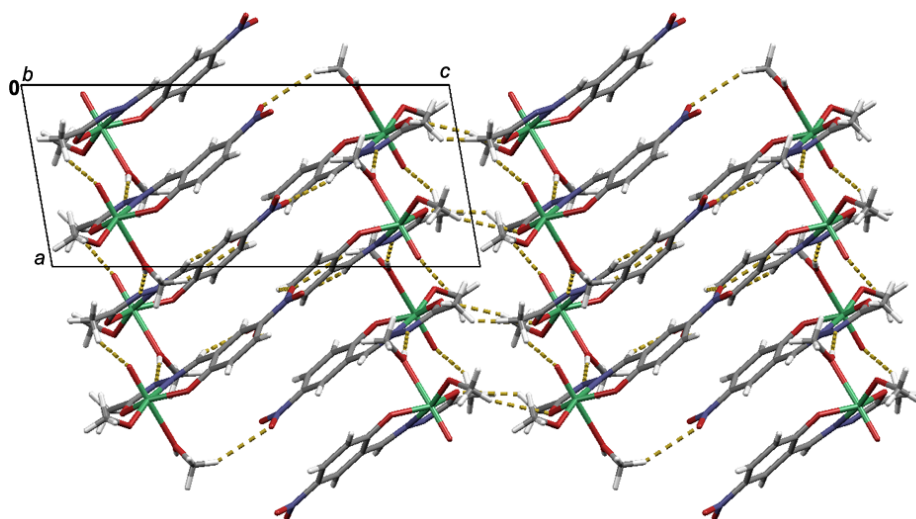

(b)

**Figure S18.** Crystal packing in  $[\text{VO}(\text{L}^1)(\text{OMe})(\text{MeOH})]$  (**2**) viewed down the: (a)  $a$ -axis; (b)  $b$ -axis. Hydrogen bonds are highlighted as yellow dashed lines.

**Table S6.** Selected bond lengths, angles and hydrogen bond parameters in the crystal structure of [VO<sub>2</sub>(HL<sup>3</sup>)]<sub>2</sub>·2H<sub>2</sub>O (5)

| Atoms | Bond length/Å | Atoms   | Bond length/Å | Atoms | Bond length/Å |
|-------|---------------|---------|---------------|-------|---------------|
| C2–C3 | 1.418(2)      | O3–C9   | 1.2514(19)    | V1–O4 | 1.6578(10)    |
| N1–C8 | 1.2878(19)    | V1–N1   | 2.1807(12)    | V1–O5 | 1.6199(12)    |
| N1–N2 | 1.3835(19)    | V1–O1   | 1.8872(12)    |       |               |
| N2–H2 | 0.840(16)     | V1–O3   | 2.0432(10)    |       |               |
| O1–C2 | 1.3237(17)    | V1–O4_a | 2.3420(11)    |       |               |

| Atoms     | Bond angle/° | Atoms      | Bond angle/° | Atoms      | Bond angle/° |
|-----------|--------------|------------|--------------|------------|--------------|
| C2–C1–C6  | 119.84(13)   | N2–N1–C8   | 117.89(12)   | O1–V1–O4_a | 84.73(4)     |
| C2–C1–C8  | 121.82(13)   | V1–N1–C8   | 129.40(11)   | O1–V1–O5   | 100.98(6)    |
| C6–C1–C8  | 118.31(14)   | V1–N1–N2   | 112.67(9)    | O3–V1–N1   | 73.27(5)     |
| C1–C2–C3  | 118.42(13)   | C9–N2–H2   | 122.7(13)    | O3–V1–O4   | 94.09(5)     |
| O1–C2–C1  | 123.59(12)   | N1–N2–C9   | 113.96(13)   | O3–V1–O4_a | 76.73(4)     |
| O1–C2–C3  | 117.91(13)   | N1–N2–H2   | 123.1(14)    | O3–V1–O5   | 95.49(6)     |
| C2–C3–C4  | 120.33(15)   | V1–O1–C2   | 132.34(10)   | O4–V1–N1   | 153.91(6)    |
| O2–C3–C2  | 114.50(13)   | V1–O3–C9   | 119.77(10)   | O4–V1–O4_a | 78.60(5)     |
| C1–C6–C5  | 120.35(16)   | V1–O4–V1_a | 101.40(5)    | O4–V1–O5   | 106.34(6)    |
| N1–C8–C1  | 121.94(13)   | N1–V1–O4_a | 76.33(4)     | O5–V1–N1   | 97.68(6)     |
| N2–C9–C10 | 119.04(15)   | O1–V1–N1   | 82.34(5)     | O5–V1–O4_a | 171.22(6)    |
| O3–C9–C10 | 120.93(15)   | O1–V1–O3   | 152.15(5)    |            |              |
| O3–C9–N2  | 120.03(14)   | O1–V1–O4   | 102.49(5)    |            |              |

| D–H⋯A     | D–H       | H⋯A       | D⋯A        | ∠D–H⋯A | Symmetry code         |
|-----------|-----------|-----------|------------|--------|-----------------------|
| N2–H2⋯O6  | 0.840(16) | 1.847(16) | 2.6849(19) | 175(2) | <i>x, y, z</i>        |
| O6–H6A⋯O3 | 0.79(3)   | 2.31(3)   | 2.9259(17) | 135(3) | 1+ <i>x, y, z</i>     |
| O6–H6B⋯O5 | 0.81(2)   | 1.99(2)   | 2.7913(18) | 169(3) | 1– <i>x, 1–y, 2–z</i> |
| C8–H8⋯O4  | 0.93      | 2.31      | 3.0514(17) | 137    | 1+ <i>x, y, z</i>     |

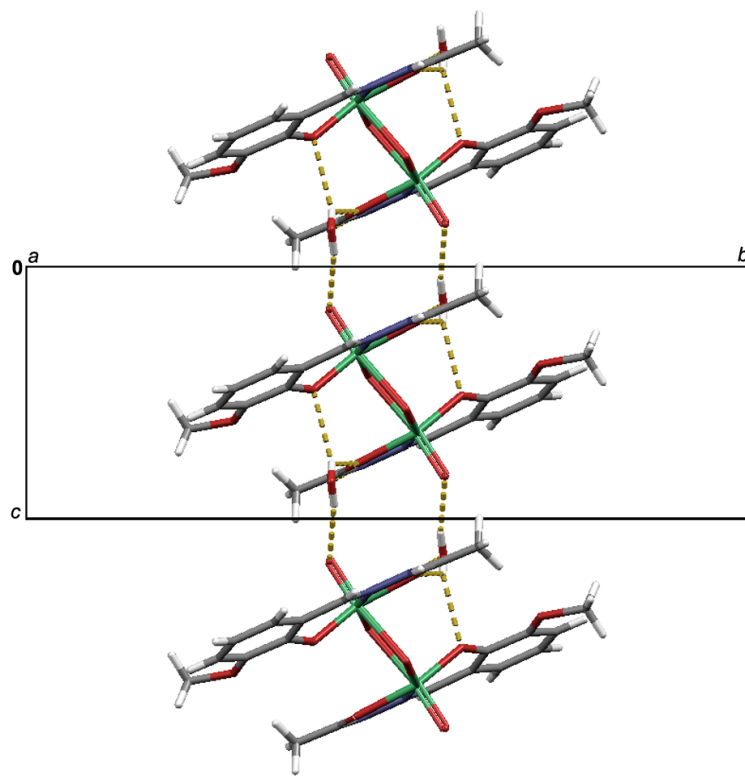

(a)

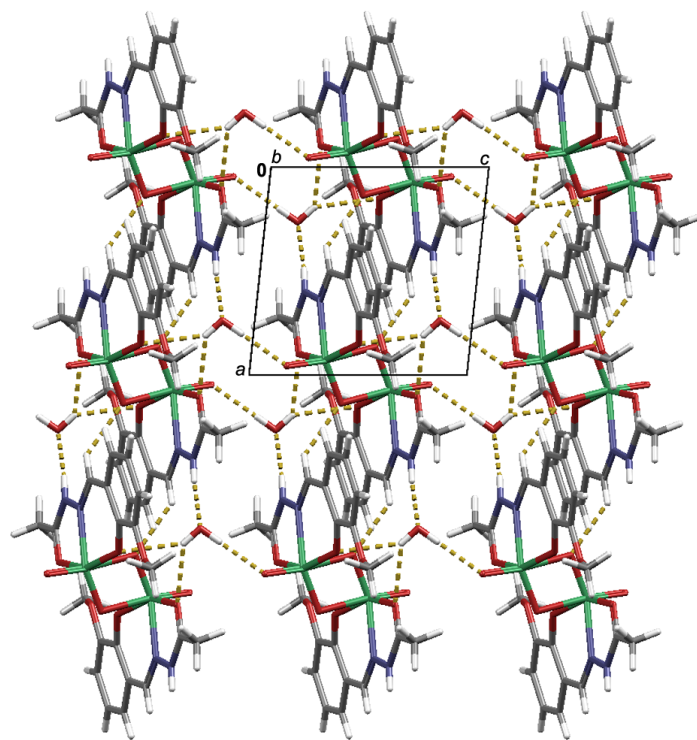

(b)

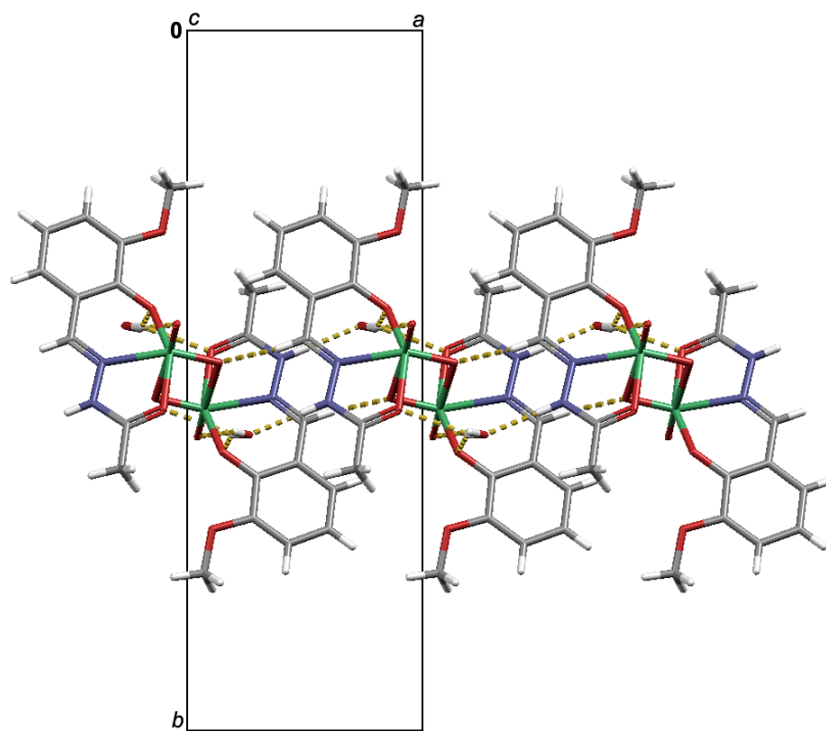

(c)

**Figure S19.** Supramolecular layers formed in formed in *ac*-plane in  $[\text{VO}_2(\text{HL}^3)]_2 \cdot 2\text{H}_2\text{O}$  (**6**) viewed down the: (a) *a*-axis; (b) *b*-axis, (c) *c*-axis. Hydrogen bonds are highlighted as yellow dashed lines. Hydrogen bonds are highlightes as yellow dashed lines.

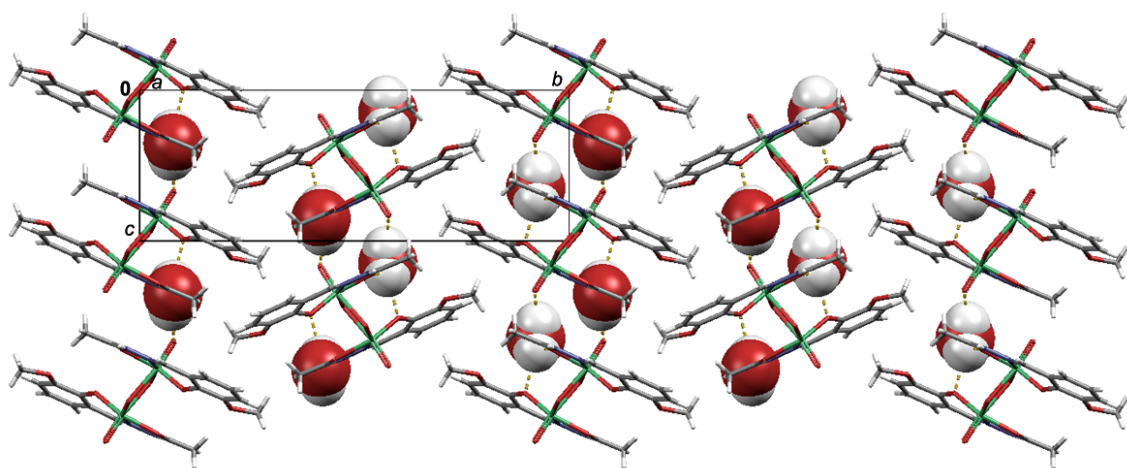

(a)

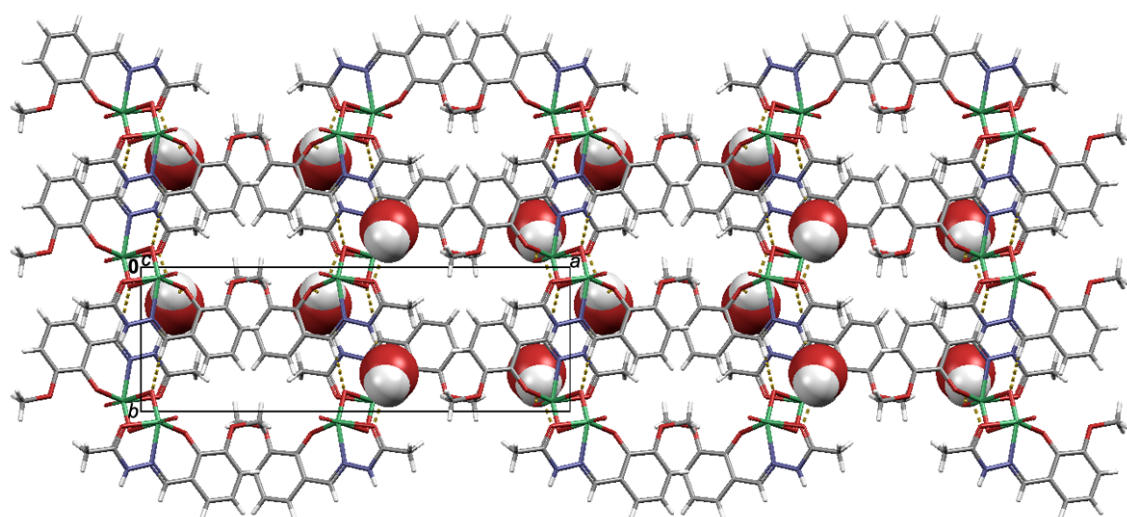

(b)

**Figure S20.** Crystal packing in  $[\text{VO}_2(\text{HL}^3)]_2 \cdot 2\text{H}_2\text{O}$  (**6**) viewed down the: (a)  $a$ -axis; (b)  $c$ -axis. Crystal water molecules are highlighted in spacefill style. Hydrogen bonds are highlighted as yellow dashed lines.

**Table S7.** Selected bond lengths, angles and hydrogen bond parameters in the crystal structure of [VO(L<sup>3</sup>)(OMe)(MeOH)] (7)

| Atoms  | Bond length/Å | Atoms  | Bond length/Å | Atoms | Bond length/Å |
|--------|---------------|--------|---------------|-------|---------------|
| C1–C2  | 1.405(2)      | N2–C9  | 1.306(2)      | V1–N1 | 2.1133(12)    |
| C1–C6  | 1.411(2)      | O1–C2  | 1.3285(19)    | V1–O1 | 1.8530(12)    |
| C1–C8  | 1.436(2)      | O3–C9  | 1.2917(19)    | V1–O3 | 1.9708(12)    |
| C2–C3  | 1.413(2)      | O5–C12 | 1.389(3)      | V1–O6 | 1.5868(14)    |
| C9–C10 | 1.492(2)      | O4–C11 | 1.404(2)      |       |               |
| N1–C8  | 1.286(2)      | V1–O4  | 1.7661(12)    |       |               |
| N1–N2  | 1.3958(17)    | V1–O5  | 2.3279(13)    |       |               |

| Atoms     | Bond angle/° | Atoms     | Bond angle/° | Atoms    | Bond angle/° |
|-----------|--------------|-----------|--------------|----------|--------------|
| C2–C1–C6  | 119.71(15)   | V1–O5–C12 | 128.06(13)   | O1–V1–O4 | 104.84(5)    |
| C2–C1–C8  | 121.40(14)   | V1–O4–C11 | 130.91(13)   | O1–V1–O5 | 79.96(5)     |
| C6–C1–C8  | 118.78(15)   | V1–N1–C8  | 126.39(10)   | O1–V1–O6 | 100.39(6)    |
| C1–C2–C3  | 119.02(13)   | V1–N1–N2  | 115.94(9)    | O3–V1–N1 | 74.26(5)     |
| O1–C2–C1  | 122.29(14)   | N1–N2–C9  | 108.77(12)   | O3–V1–O4 | 91.08(5)     |
| O1–C2–C3  | 118.57(14)   | V1–O1–C2  | 132.43(10)   | O3–V1–O5 | 81.21(5)     |
| C2–C3–C4  | 119.73(15)   | V1–O3–C9  | 118.13(10)   | O3–V1–O6 | 96.42(6)     |
| O2–C3–C2  | 114.98(13)   | O1–V1–N1  | 84.17(5)     | O4–V1–N1 | 158.80(5)    |
| C1–C6–C5  | 120.20(17)   | O1–V1–O3  | 153.47(5)    |          |              |
| N1–C8–C1  | 124.14(14)   | O4–V1–O6  | 102.96(6)    |          |              |
| N2–C9–C10 | 119.37(14)   | O5–V1–N1  | 80.01(5)     |          |              |
| O3–C9–C10 | 117.76(14)   | O5–V1–O6  | 173.94(6)    |          |              |
| O3–C9–N2  | 122.87(14)   | O6–V1–N1  | 93.99(6)     |          |              |
| N2–N1–C8  | 117.27(13)   | O4–V1–O5  | 82.71(5)     |          |              |

| D–H...A     | D–H     | H...A   | D...A      | ∠D–H...A | Symmetry code   |
|-------------|---------|---------|------------|----------|-----------------|
| O5–H5...N2  | 0.73(2) | 2.04(2) | 2.7675(19) | 176(2)   | 1-x,1-y,1-z     |
| C7–H7B...O6 | 0.96    | 2.56    | 3.450(3)   | 153      | x,3/2-y,1/2+z   |
| C4–H4...O6  | 0.93    | 2.48    | 3.376(2)   | 161      | -x,-1/2+y,3/2-z |
| C5–H5A...O2 | 0.93    | 2.54    | 3.382(2)   | 151      | -x,-1/2+y,3/2-z |



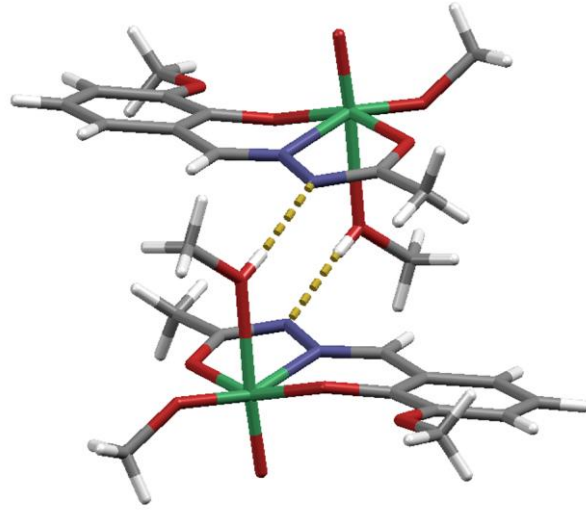

(a)

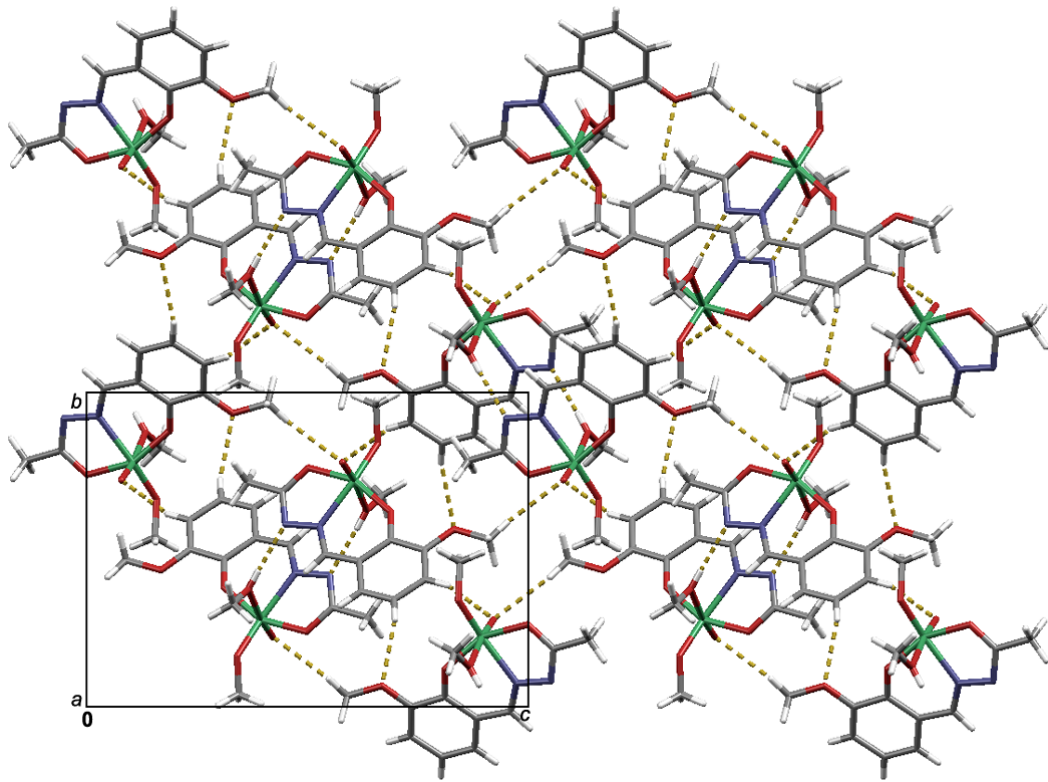

(b)

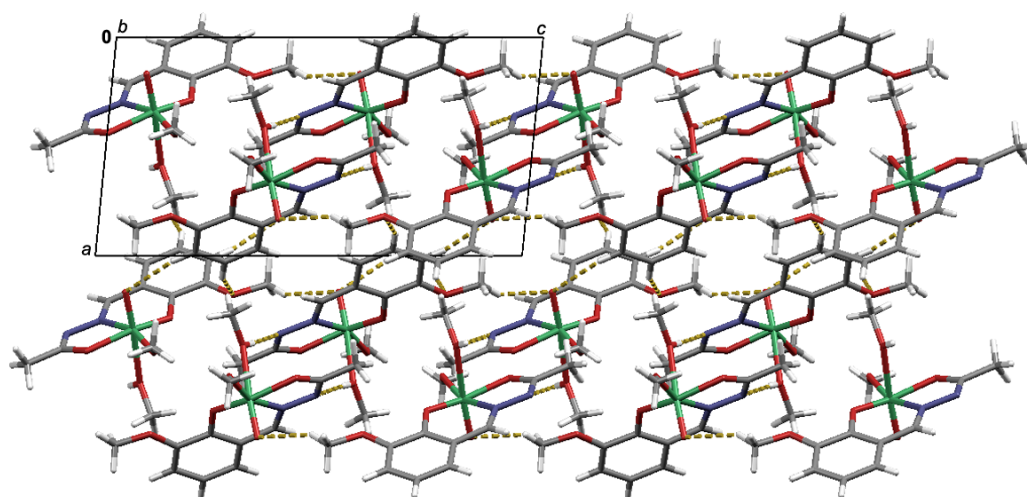

(c)

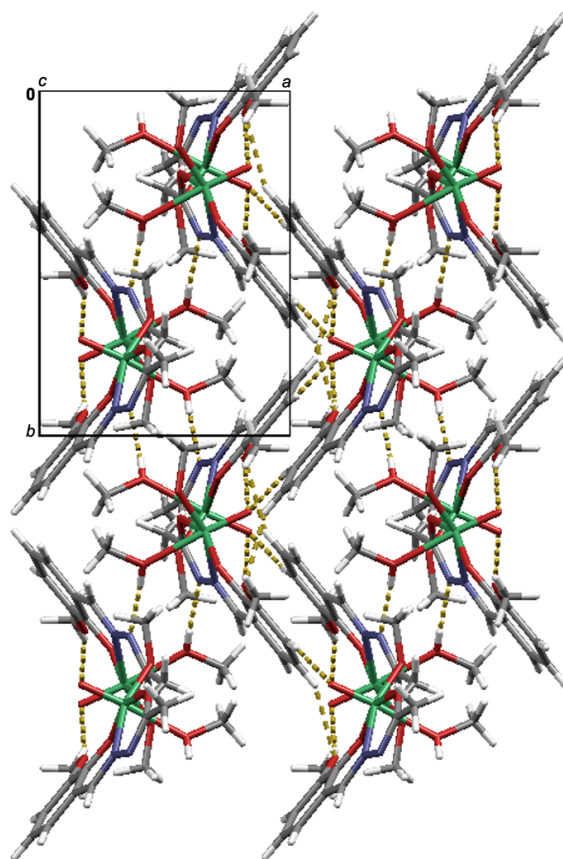

(d)

**Figure S21.** (a) Supramolecular dimers formed through  $R_2^2(10)$  hydrogen bonded motif. Crystal packing in [VO(L<sup>3</sup>)(OMe)(MeOH)] (7) viewed down the: (b) *a*-axis; (c) *b*-axis, and (d) *c*-axis. Non-coordinated methanol molecules are presented in the spacefill style. Hydrogen bonds are highlighted as yellow dashed lines.

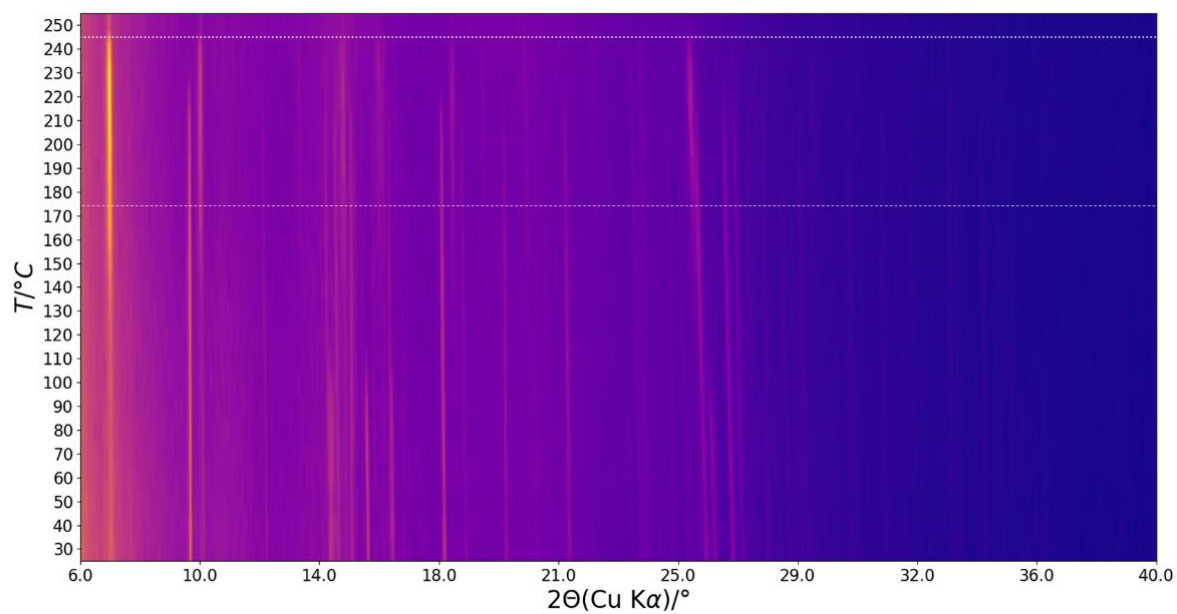

**Figure S22.** Temperature-dependent diffraction patterns of  $(\text{NH}_4)[\text{VO}_2(\text{L}^1)]$  (1)

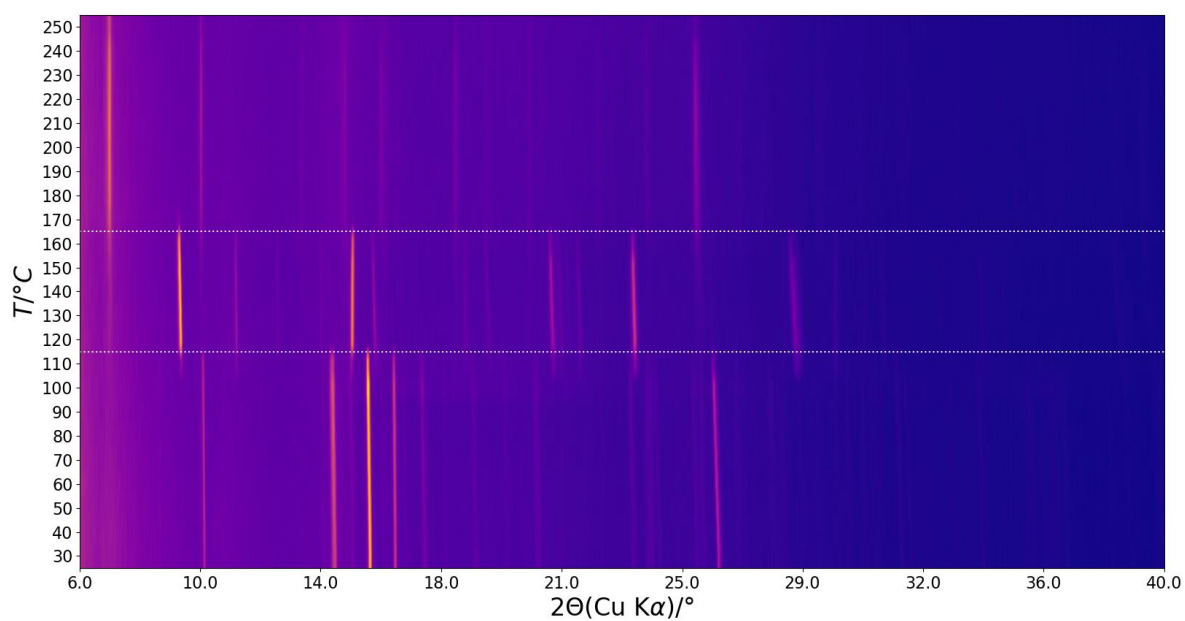

**Figure S23.** Temperature-dependent diffraction patterns of  $[\text{VO}(\text{L}^1)(\text{OMe})(\text{MeOH})]$  (2)

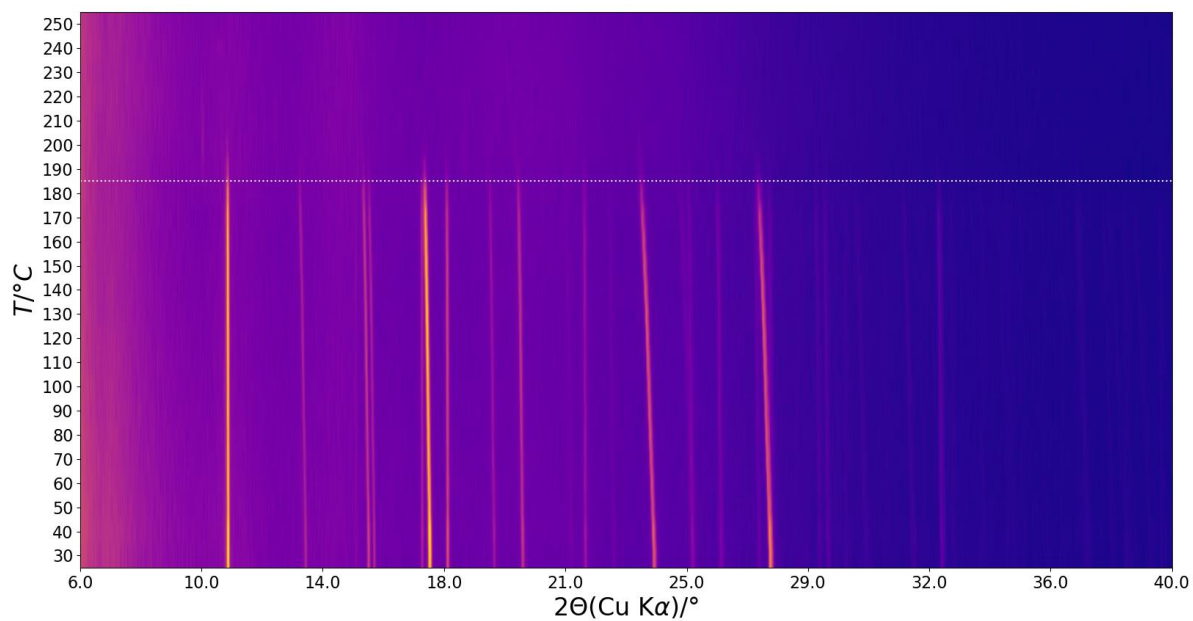

**Figure S24.** Temperature-dependent diffraction patterns of [VO<sub>2</sub>(HL<sup>2</sup>)] (4)

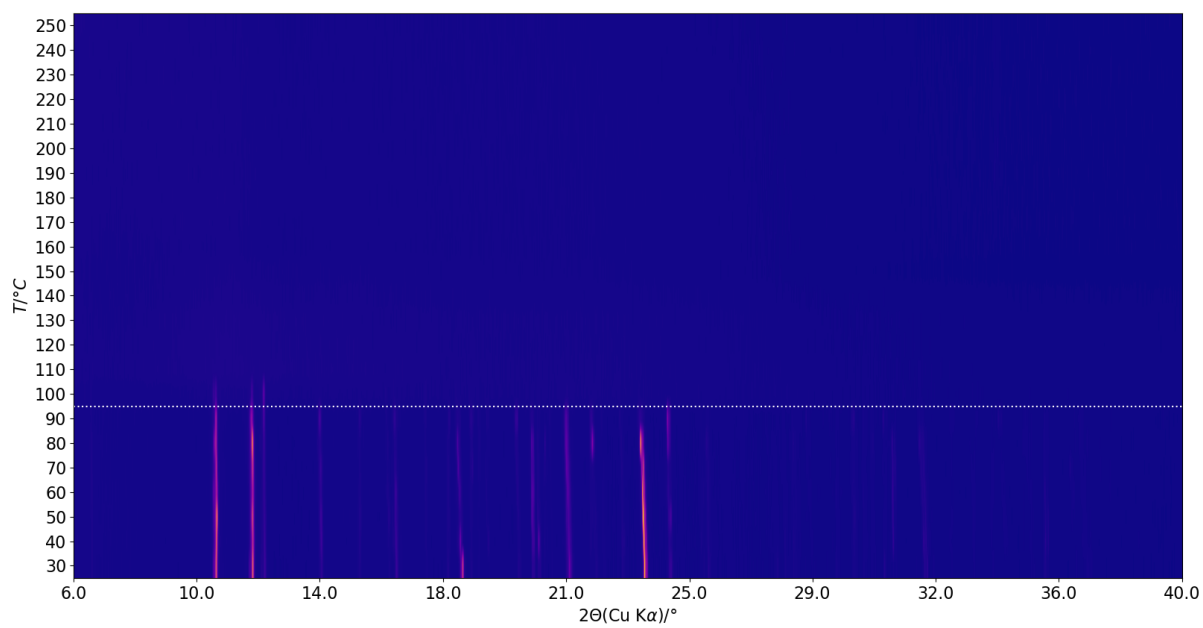

**Figure S25.** Temperature-dependent diffraction patterns of [VO(L<sup>3</sup>)(OEt)(H<sub>2</sub>O)] (5)

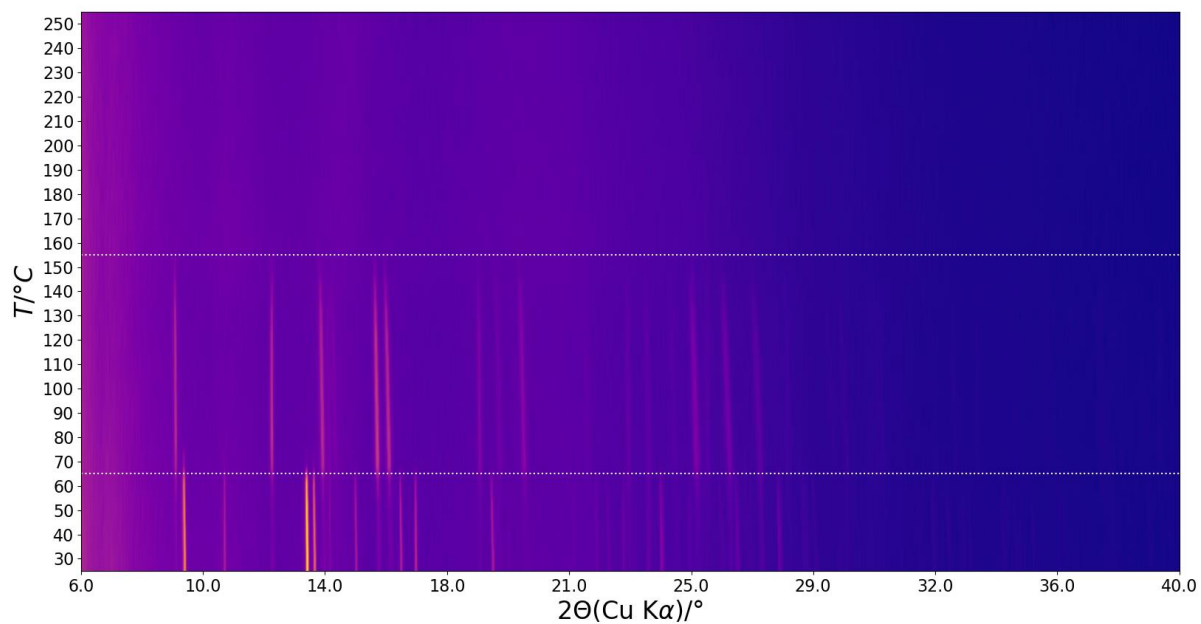

**Figure S26.** Temperature-dependent diffraction patterns of  $[\text{VO}(\text{L}^3)(\text{OMe})(\text{MeOH})]$  (**7**)

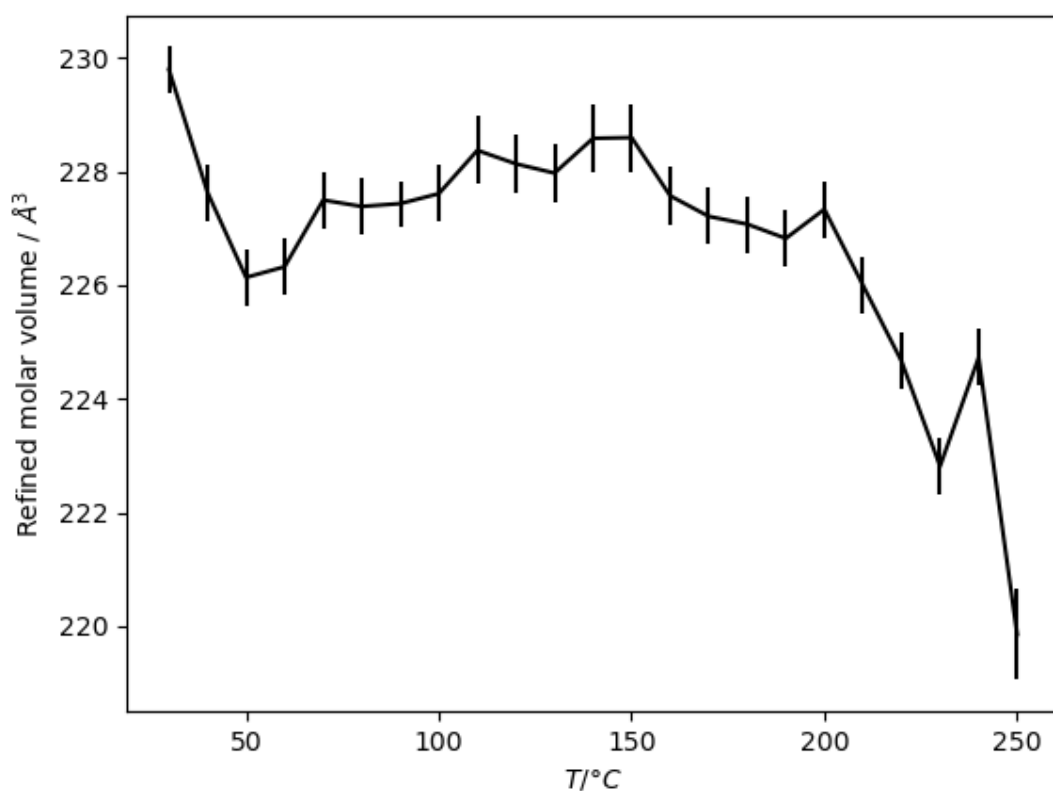

**Figure S27.** Temperature dependence of refined molar volume of the  $(\text{NH}_4)[\text{VO}_2(\text{L}^1)]$  (**1**) compound, which is calculated as  $\frac{1}{8}V_{\text{cell}}$ . Vertical bars represent standard uncertainty. Due to poor crystallinity of the compound, and consequently low diffraction data quality, the molar volume could not be refined precisely, but the overall change across the whole temperature range is insignificant - around 2%. However, above 160 °C the sample converts to another phase with similar unit cell parameters.

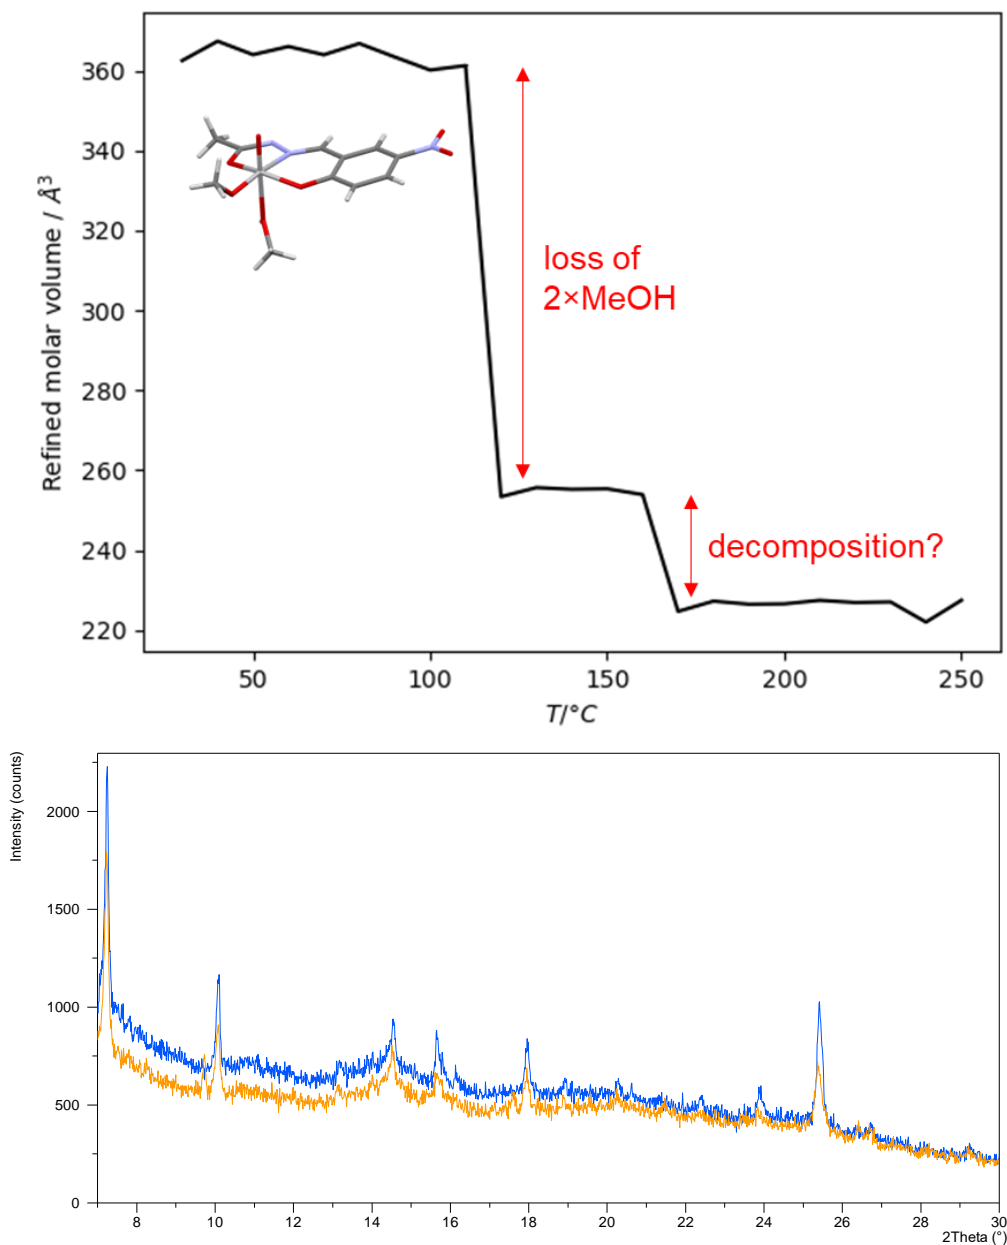

**Figure S28.** (Top) Temperature dependence of refined molar volume of the  $[\text{VO}(\text{L}^1)(\text{OMe})(\text{MeOH})]$  (**2**) compound, which is calculated as  $\frac{1}{4}V_{\text{cell}}$  below  $160\text{ }^\circ\text{C}$ , and  $\frac{1}{8}V_{\text{cell}}$  above it. Standard uncertainties are very low, and not visible in the graph. At low temperatures the molar volume corresponds to the  $\text{VO}(\text{L}^1)$  moiety ligated with methoxy/methanol ligands. Above  $110\text{ }^\circ\text{C}$  the change in molar volume corresponds to the loss of two methanol molecules per moiety (ca.  $100\text{ \AA}^3$  as calculated from methanol crystal structure). (Bottom) Above  $160\text{ }^\circ\text{C}$  sample probably converts to  $[\text{VO}_2(\text{HL}^1)]$ , the same phase observed in high temperature PXRD patterns of  $(\text{NH}_4)[\text{VO}_2(\text{L}^1)]$  (**1**).

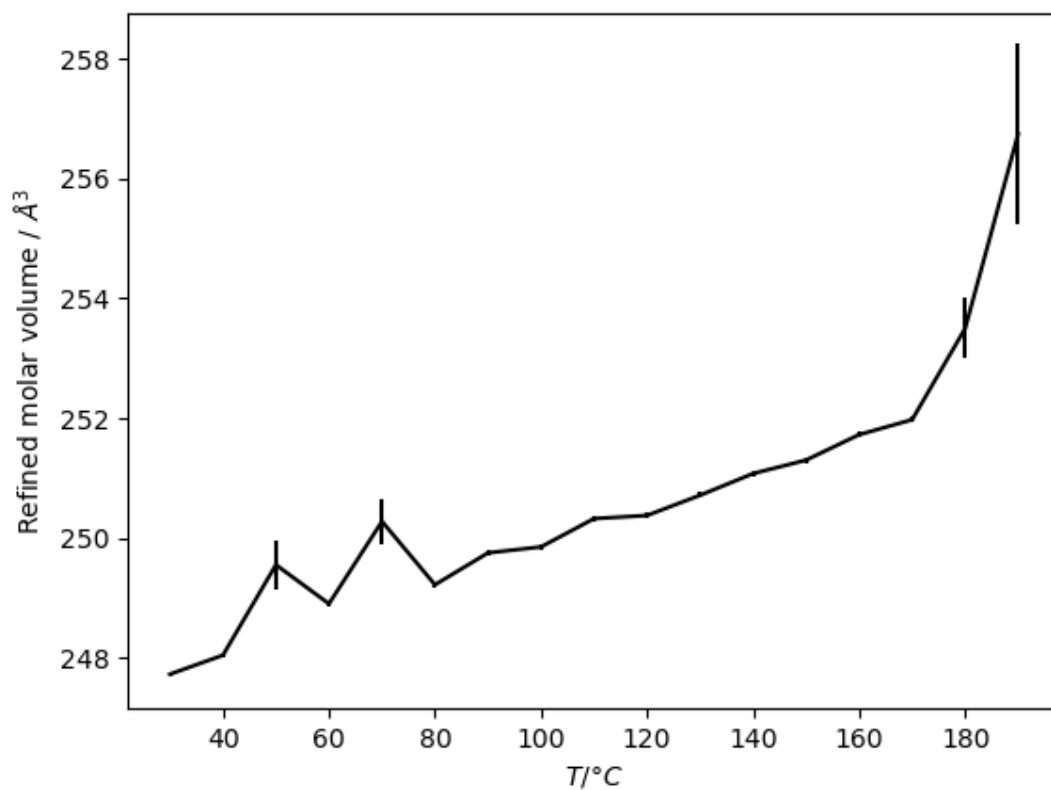

**Figure S29.** Temperature dependence of refined molar volume of the  $[\text{VO}_2(\text{HL}^2)]$  (**4**) compound, which is calculated as  $\frac{1}{4}V_{\text{cell}}$ . Vertical bars represent standard uncertainty. Molar volume increases smoothly across the whole temperature range, and the overall change across the whole temperature range is insignificant - around 4%. Partial amorphization begins at around 180 °C, as evidenced by high uncertainty of molar volume at those temperatures.

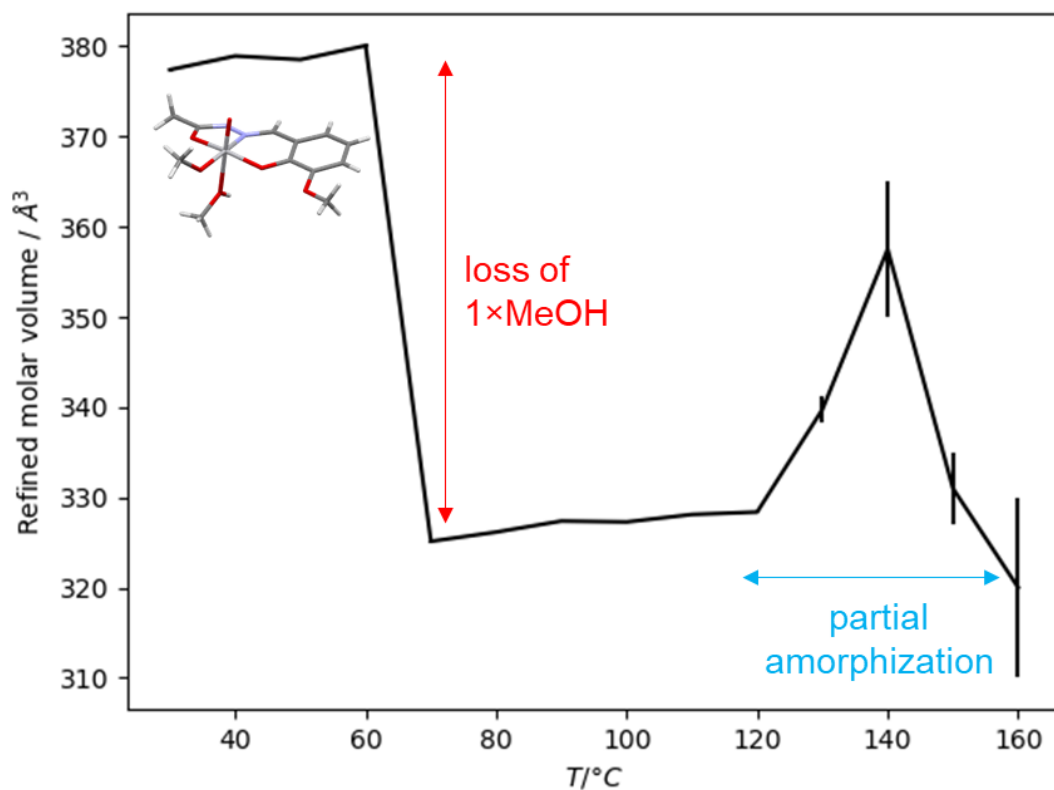

**Figure S30.** Temperature dependence of refined molar volume of the  $[\text{VO}(\text{L}^3)(\text{OMe})(\text{MeOH})]$  (**7**) compound, which is calculated as  $\frac{1}{4}V_{\text{cell}}$ . Vertical bars represent standard uncertainty. At low temperatures the molar volume corresponds to the  $\text{VO}(\text{L})$  moiety ligated with methoxy/methanol ligands. Above 60 °C the change in molar volume corresponds to loss of one methanol molecule per moiety (ca. 50 Å<sup>3</sup> as calculated from methanol crystal structure). Above 120 °C partial amorphization of the sample prevents precise refinements of molar volume.



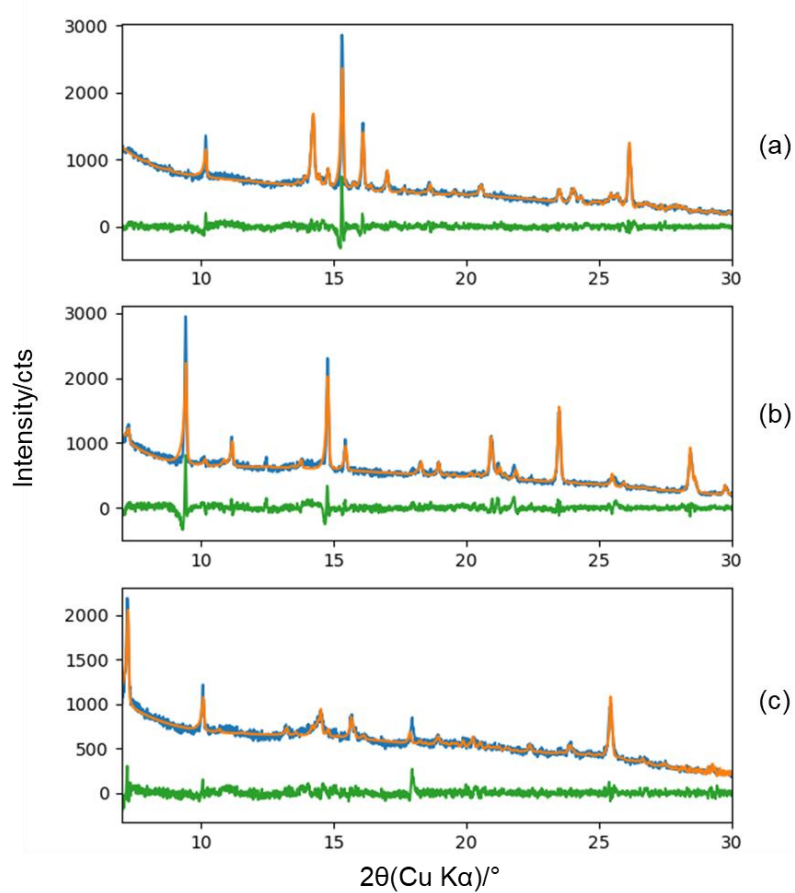

**Figure S31.** Examples of le Bail refinement on temperature-dependent PXRD data of  $[\text{VO}(\text{L}^1)(\text{OMe})(\text{MeOH})]$  (**2**), at (a) 30 °C using unit cell parameters of  $[\text{VO}(\text{L}^1)(\text{OMe})(\text{MeOH})]$ , (b) 140 °C, unit cell parameters of intermediate phase:  $a = 13.310(3) \text{ \AA}$ ,  $b = 9.9181(17) \text{ \AA}$ ,  $c = 8.6416(14) \text{ \AA}$ ,  $\alpha = 100.751(18)^\circ$ ,  $\beta = 108.367(10)^\circ$ ,  $\gamma = 101.710(17)^\circ$ , (c) 200 °C, unit cell parameters of  $[\text{VO}_2(\text{HL}^1)]$ ,  $a = 15.2143(15) \text{ \AA}$ ,  $b = 12.8189(13) \text{ \AA}$ ,  $c = 9.7818(11) \text{ \AA}$ ,  $\alpha = 107.074(10)^\circ$ ,  $\beta = 93.985(11)^\circ$ ,  $\gamma = 93.584(9)^\circ$ . The refinement results for (c) are similar to high temperature phase of  $(\text{NH}_4)[\text{VO}_2(\text{L}^1)]$  results.

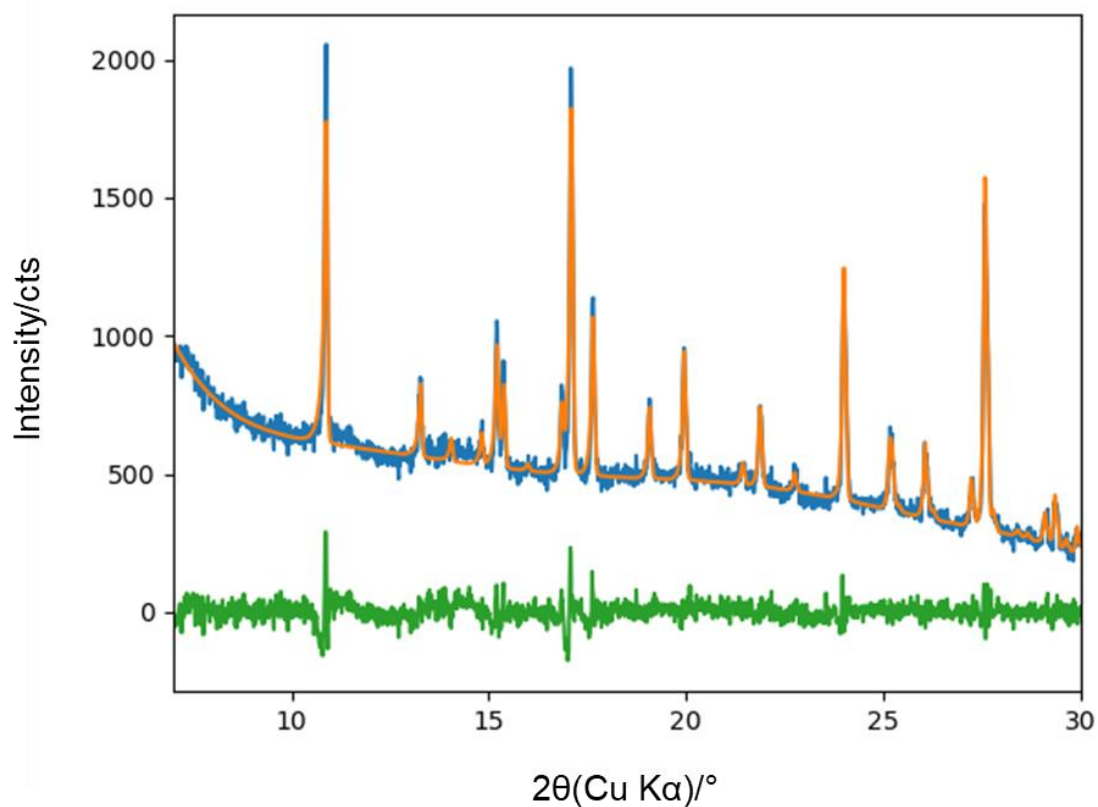

**Figure S32.** Example of le Bail refinement on temperature-dependent PXRD data of  $[\text{VO}_2(\text{HL}^2)]$  (4), at  $30\text{ }^\circ\text{C}$  using unit cell parameters of  $[\text{VO}_2(\text{HL}^2)]$  (4).

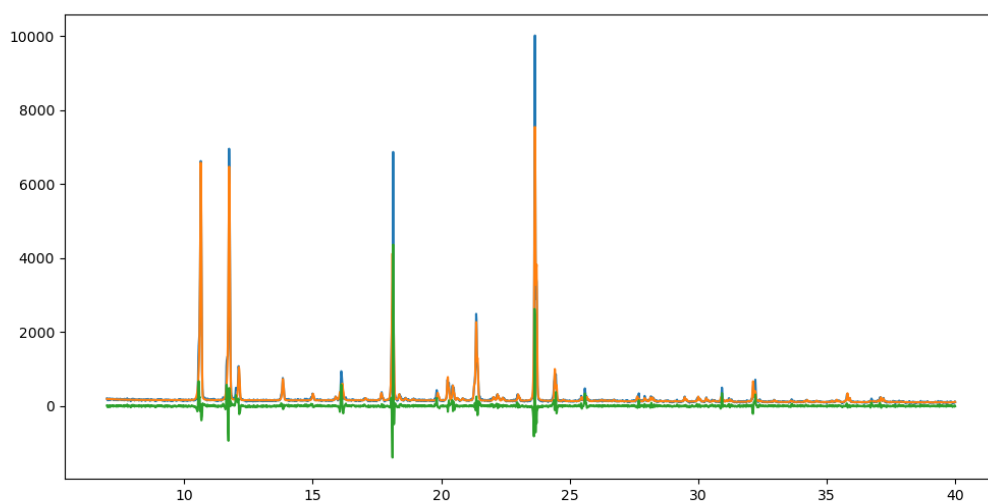

**Figure S33.** Example of le Bail refinement on temperature-dependent PXRD data of  $[\text{VO}(\text{L}^3)(\text{OEt})(\text{H}_2\text{O})]$  (5), at  $30\text{ }^\circ\text{C}$  using cell parameters of  $[\text{VO}(\text{L}^3)(\text{OEt})(\text{H}_2\text{O})]$  (5).

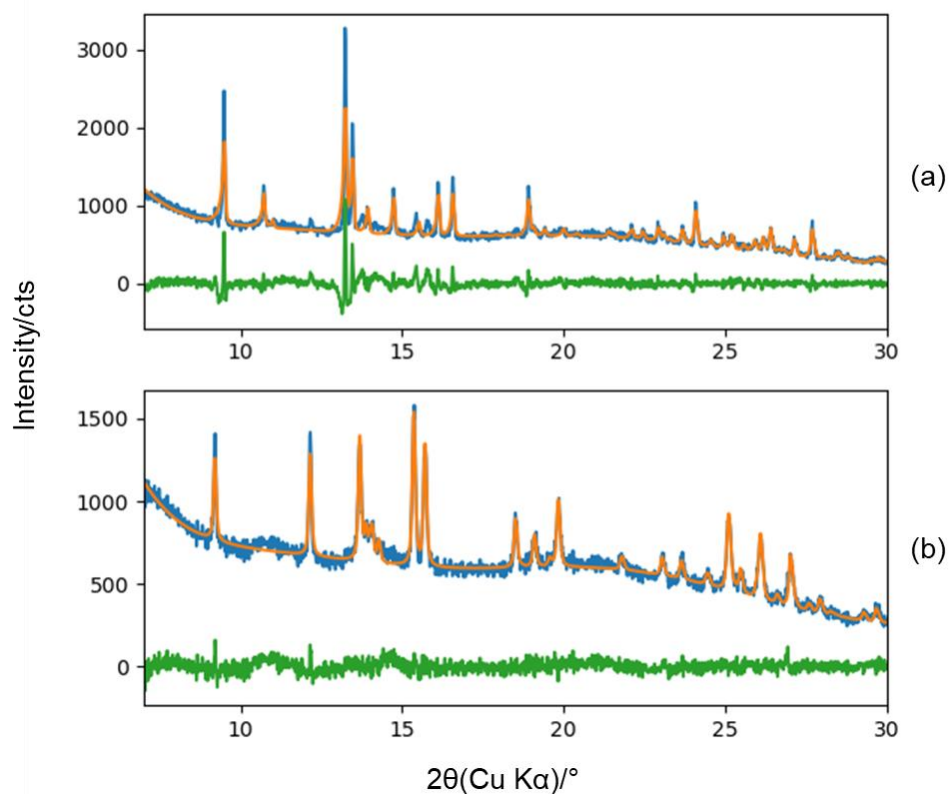

**Figure S34.** Examples of le Bail refinement on temperature-dependent PXRD data of  $[\text{VO}(\text{L}^3)(\text{OMe})(\text{MeOH})]$  (**7**), at (a) 30 °C using unit cell parameters of  $[\text{VO}(\text{L}^3)(\text{OMe})(\text{MeOH})]$  (**7**), (b) 100 °C, unit cell parameters of high-temperature phase:  $a = 14.532(3) \text{ \AA}$ ,  $b = 12.726(3) \text{ \AA}$ ,  $c = 7.0829(10) \text{ \AA}$ ,  $\alpha = \gamma = 90^\circ$ ,  $\beta = 92.019(9)^\circ$ .

**Table S8.** Tabulated weighted residual ( $R_{wp}$ ) and unit cell parameters refined by le Bail fit from temperature-dependent PXRD data.

| Sample                                                        | T / °C | $R_{wp}$   | a/Å        | b/Å         | c/Å        | $\alpha/^\circ$ | $\beta/^\circ$ | $\gamma/^\circ$ | V/Å <sup>3</sup> |
|---------------------------------------------------------------|--------|------------|------------|-------------|------------|-----------------|----------------|-----------------|------------------|
| (1)<br><b>(NH<sub>4</sub>)[VO<sub>2</sub>(L<sup>1</sup>)]</b> | 30     | 5.604      | 15.250(6)  | 12.994(7)   | 9.819(5)   | 106.52(2)       | 93.52(3)       | 94.02(4)        | 1854.1(16)       |
|                                                               | 40     | 5.736      | 15.251(5)  | 12.997(6)   | 9.805(5)   | 106.46(2)       | 93.40(3)       | 94.10(3)        | 1852.6(15)       |
|                                                               | 50     | 5.587      | 15.265(7)  | 13.013(7)   | 9.809(6)   | 106.40(2)       | 93.36(4)       | 94.10(4)        | 1858.0(17)       |
|                                                               | 60     | 5.740      | 15.303(6)  | 13.064(8)   | 9.874(6)   | 106.49(2)       | 93.45(4)       | 93.99(4)        | 1881.5(18)       |
|                                                               | 70     | 5.867      | 15.309(7)  | 13.072(8)   | 9.861(6)   | 106.40(2)       | 93.29(3)       | 94.04(4)        | 1882.2(18)       |
|                                                               | 80     | 5.644      | 15.327(6)  | 13.078(7)   | 9.850(6)   | 106.32(2)       | 93.24(3)       | 94.06(4)        | 1884.0(17)       |
|                                                               | 90     | 5.692      | 15.330(7)  | 13.080(7)   | 9.866(6)   | 106.33(2)       | 93.22(3)       | 94.09(3)        | 1887.6(18)       |
|                                                               | 100    | 5.660      | 15.349(7)  | 13.091(8)   | 9.875(6)   | 106.28(3)       | 93.21(4)       | 94.07(4)        | 1893.9(19)       |
|                                                               | 110    | 5.376      | 15.327(5)  | 13.055(6)   | 9.977(4)   | 106.15(2)       | 92.25(3)       | 94.25(3)        | 1908.7(13)       |
|                                                               | 120    | 5.492      | 15.334(6)  | 13.062(7)   | 10.004(6)  | 106.06(3)       | 92.39(5)       | 94.26(4)        | 1916.1(18)       |
|                                                               | 130    | 5.345      | 15.352(5)  | 13.075(5)   | 10.003(6)  | 105.97(2)       | 92.48(5)       | 94.24(3)        | 1920.8(15)       |
|                                                               | 140    | 5.815      | 15.376(7)  | 13.138(7)   | 9.984(5)   | 105.74(3)       | 92.31(5)       | 94.50(3)        | 1931.3(16)       |
|                                                               | 150    | 5.888      | 15.405(7)  | 13.091(8)   | 10.062(5)  | 105.73(3)       | 91.64(5)       | 94.76(4)        | 1943.7(18)       |
|                                                               | 160    | 5.840      | 15.396(7)  | 13.069(6)   | 10.077(4)  | 105.67(3)       | 91.27(4)       | 94.87(3)        | 1943.1(15)       |
|                                                               | 170    | 5.619      | 15.391(6)  | 13.046(9)   | 10.043(5)  | 105.87(3)       | 91.37(3)       | 94.88(3)        | 1930.3(18)       |
|                                                               | 180    | 5.655      | 15.398(6)  | 13.063(7)   | 10.050(4)  | 105.86(3)       | 91.29(3)       | 94.87(3)        | 1935.3(15)       |
|                                                               | 190    | 5.961      | 15.408(6)  | 13.051(7)   | 10.053(3)  | 105.86(3)       | 91.41(3)       | 94.89(3)        | 1935.1(14)       |
|                                                               | 200    | 5.871      | 15.406(8)  | 13.039(10)  | 10.047(5)  | 105.87(3)       | 91.27(4)       | 94.97(4)        | 1932(2)          |
|                                                               | 210    | 5.567      | 15.414(9)  | 13.038(11)  | 10.045(5)  | 105.86(3)       | 91.33(4)       | 95.01(5)        | 1932(2)          |
|                                                               | 220    | 4.923      | 15.389(15) | 12.789(14)  | 9.975(7)   | 105.49(5)       | 90.49(5)       | 95.56(8)        | 1882(3)          |
| 230                                                           | 5.021  | 15.426(17) | 12.823(14) | 9.993(7)    | 105.49(4)  | 91.00(7)        | 94.74(10)      | 1897(3)         |                  |
| 240                                                           | 4.931  | 15.361(17) | 12.739(18) | 9.972(9)    | 105.42(6)  | 90.63(8)        | 94.70(11)      | 1874(4)         |                  |
| 250                                                           | 4.552  | 15.52(7)   | 12.68(9)   | 9.87(6)     | 105.53(18) | 91.2(2)         | 94.8(4)        | 1862(19)        |                  |
| (2)<br><b>[VO(L<sub>1</sub>)(OMe)(MeOH)]</b>                  | 30     | 6.582      | 7.5592(10) | 11.0960(18) | 17.737(3)  | 81.464(13)      | 80.358(10)     | 89.829(10)      | 1450.1(4)        |
|                                                               | 40     | 6.844      | 7.5879(11) | 11.1493(18) | 17.823(3)  | 81.331(13)      | 80.444(9)      | 89.822(10)      | 1469.5(4)        |
|                                                               | 50     | 6.725      | 7.5709(9)  | 11.1098(19) | 17.766(4)  | 81.375(15)      | 80.323(12)     | 89.830(11)      | 1456.0(4)        |
|                                                               | 60     | 6.890      | 7.5836(9)  | 11.1283(18) | 17.803(4)  | 81.425(14)      | 80.342(11)     | 89.839(10)      | 1464.2(4)        |
|                                                               | 70     | 6.865      | 7.5774(10) | 11.104(2)   | 17.758(4)  | 81.387(15)      | 80.328(11)     | 89.819(10)      | 1455.9(5)        |
|                                                               | 80     | 6.701      | 7.5924(10) | 11.1347(19) | 17.821(4)  | 81.304(13)      | 80.211(13)     | 89.848(9)       | 1467.2(4)        |

|                                                 |       |           |             |             |             |             |             |             |             |
|-------------------------------------------------|-------|-----------|-------------|-------------|-------------|-------------|-------------|-------------|-------------|
|                                                 | 90    | 7.480     | 7.5401(11)  | 11.119(2)   | 17.791(3)   | 81.407(15)  | 80.382(12)  | 89.890(13)  | 1453.7(5)   |
|                                                 | 100   | 7.600     | 7.5317(12)  | 11.077(2)   | 17.725(4)   | 81.451(17)  | 80.208(15)  | 89.708(15)  | 1440.6(5)   |
|                                                 | 110   | 7.904     | 7.5292(11)  | 11.091(3)   | 17.760(4)   | 81.640(19)  | 80.126(14)  | 89.897(12)  | 1445.1(5)   |
|                                                 | 120   | 8.328     | 13.280(3)   | 9.9195(18)  | 8.6376(15)  | 100.928(17) | 108.759(11) | 101.848(17) | 1013.5(4)   |
|                                                 | 130   | 7.944     | 13.309(3)   | 9.9230(16)  | 8.6575(16)  | 100.913(18) | 108.457(10) | 101.534(16) | 1022.6(4)   |
|                                                 | 140   | 8.060     | 13.310(3)   | 9.9181(17)  | 8.6416(14)  | 100.751(18) | 108.367(10) | 101.710(17) | 1020.9(4)   |
|                                                 | 150   | 8.060     | 13.313(3)   | 9.9207(17)  | 8.6342(13)  | 100.596(16) | 108.265(11) | 101.826(16) | 1021.4(3)   |
|                                                 | 160   | 7.658     | 13.262(3)   | 9.924(3)    | 8.6355(15)  | 100.696(17) | 108.400(13) | 101.979(17) | 1015.6(4)   |
|                                                 | 170   | 5.673     | 15.1799(17) | 12.7879(10) | 9.7514(13)  | 107.196(11) | 93.952(11)  | 93.550(11)  | 1797.3(4)   |
|                                                 | 180   | 6.071     | 15.2240(14) | 12.8235(12) | 9.7956(10)  | 106.965(9)  | 93.894(10)  | 93.661(7)   | 1817.9(3)   |
|                                                 | 190   | 6.312     | 15.2128(16) | 12.8183(13) | 9.7810(11)  | 107.088(9)  | 93.974(10)  | 93.642(8)   | 1811.7(3)   |
|                                                 | 200   | 6.028     | 15.2143(15) | 12.8189(13) | 9.7818(11)  | 107.074(10) | 93.985(11)  | 93.584(9)   | 1812.4(3)   |
|                                                 | 210   | 6.235     | 15.2355(14) | 12.8297(13) | 9.7956(10)  | 107.029(9)  | 93.849(10)  | 93.693(8)   | 1819.5(3)   |
|                                                 | 220   | 6.007     | 15.2254(15) | 12.8232(14) | 9.7856(12)  | 107.044(12) | 94.025(13)  | 93.621(10)  | 1815.1(4)   |
|                                                 | 230   | 6.149     | 15.2302(15) | 12.8319(13) | 9.7861(11)  | 107.137(10) | 93.958(11)  | 93.601(9)   | 1816.3(3)   |
|                                                 | 240   | 5.411     | 15.1059(16) | 12.7420(19) | 9.7202(11)  | 107.256(11) | 93.824(11)  | 93.663(10)  | 1775.9(4)   |
|                                                 | 250   | 5.468     | 15.2285(15) | 12.8262(13) | 9.7998(11)  | 106.961(10) | 93.907(11)  | 93.651(8)   | 1819.6(3)   |
| <b>[VO<sub>2</sub>(HL<sup>2</sup>)<br/>(4)]</b> | 30    | 6.037     | 7.5012(6)   | 11.9348(11) | 11.2087(15) | 90          | 99.081(6)   | 90          | 990.89(18)  |
|                                                 | 40    | 5.843     | 7.5098(5)   | 11.9342(12) | 11.2113(13) | 90          | 99.097(6)   | 90          | 992.16(17)  |
|                                                 | 50    | 13.196    | 7.523(6)    | 11.972(10)  | 11.222(12)  | 90          | 99.02(5)    | 90          | 998.2(16)   |
|                                                 | 60    | 5.774     | 7.5266(6)   | 11.9442(13) | 11.2157(17) | 90          | 99.100(6)   | 90          | 995.6(2)    |
|                                                 | 70    | 12.684    | 7.538(5)    | 11.980(10)  | 11.224(12)  | 90          | 99.00(5)    | 90          | 1001.1(15)  |
|                                                 | 80    | 5.674     | 7.5396(6)   | 11.9410(13) | 11.2139(15) | 90          | 99.106(6)   | 90          | 996.87(19)  |
|                                                 | 90    | 6.091     | 7.5491(6)   | 11.9462(14) | 11.2193(16) | 90          | 99.121(7)   | 90          | 999.0(2)    |
|                                                 | 100   | 5.699     | 7.5544(6)   | 11.9442(14) | 11.2181(15) | 90          | 99.130(6)   | 90          | 999.40(19)  |
|                                                 | 110   | 5.910     | 7.5637(6)   | 11.9470(13) | 11.2232(15) | 90          | 99.143(6)   | 90          | 1001.29(19) |
|                                                 | 120   | 6.050     | 7.5683(6)   | 11.9461(15) | 11.2200(17) | 90          | 99.134(7)   | 90          | 1001.5(2)   |
|                                                 | 130   | 5.952     | 7.5763(5)   | 11.9443(14) | 11.2247(15) | 90          | 99.146(6)   | 90          | 1002.85(19) |
|                                                 | 140   | 5.876     | 7.5852(6)   | 11.9463(15) | 11.2258(15) | 90          | 99.150(6)   | 90          | 1004.3(2)   |
|                                                 | 150   | 5.815     | 7.5960(6)   | 11.9435(14) | 11.2234(15) | 90          | 99.183(7)   | 90          | 1005.2(2)   |
| 160                                             | 5.745 | 7.6048(6) | 11.9455(16) | 11.2279(16) | 90          | 99.180(7)   | 90          | 1006.9(2)   |             |

|                                                     |     |                         |            |             |             |    |            |    |           |
|-----------------------------------------------------|-----|-------------------------|------------|-------------|-------------|----|------------|----|-----------|
|                                                     | 170 | 5.533                   | 7.6138(7)  | 11.9435(17) | 11.2273(19) | 90 | 99.188(7)  | 90 | 1007.9(2) |
|                                                     | 180 | 9.883                   | 7.641(10)  | 11.941(14)  | 11.257(17)  | 90 | 99.21(7)   | 90 | 1014(2)   |
|                                                     | 190 | 5.909                   | 7.69(3)    | 12.05(4)    | 11.23(4)    | 90 | 99.4(2)    | 90 | 1027(6)   |
|                                                     | 200 | Amorphous - not refined |            |             |             |    |            |    |           |
|                                                     | 210 |                         |            |             |             |    |            |    |           |
|                                                     | 220 |                         |            |             |             |    |            |    |           |
|                                                     | 230 |                         |            |             |             |    |            |    |           |
|                                                     | 240 |                         |            |             |             |    |            |    |           |
|                                                     | 250 |                         |            |             |             |    |            |    |           |
| <b>[VO(L<sup>3</sup>)(OMe)(MeOH)]</b><br><b>(7)</b> | 30  |                         |            |             |             |    |            |    |           |
|                                                     | 40  | 8.548                   | 8.2766(15) | 11.403(3)   | 16.135(3)   | 90 | 95.515(13) | 90 | 1515.7(5) |
|                                                     | 50  | 8.767                   | 8.2708(16) | 11.400(3)   | 16.131(3)   | 90 | 95.456(14) | 90 | 1514.1(6) |
|                                                     | 60  | 9.064                   | 8.2776(18) | 11.424(3)   | 16.149(4)   | 90 | 95.411(16) | 90 | 1520.3(6) |
|                                                     | 70  | 5.237                   | 14.513(3)  | 12.703(2)   | 7.0590(10)  | 90 | 92.057(9)  | 90 | 1300.5(4) |
|                                                     | 80  | 4.857                   | 14.527(3)  | 12.713(2)   | 7.0686(9)   | 90 | 92.043(8)  | 90 | 1304.6(4) |
|                                                     | 90  | 4.950                   | 14.541(3)  | 12.731(2)   | 7.0782(10)  | 90 | 92.034(8)  | 90 | 1309.5(4) |
|                                                     | 100 | 5.002                   | 14.532(3)  | 12.726(3)   | 7.0829(10)  | 90 | 92.019(9)  | 90 | 1309.1(4) |
|                                                     | 110 | 4.924                   | 14.534(4)  | 12.743(3)   | 7.0903(11)  | 90 | 91.995(9)  | 90 | 1312.4(5) |
|                                                     | 120 | 4.902                   | 14.531(3)  | 12.743(3)   | 7.0979(10)  | 90 | 91.968(9)  | 90 | 1313.5(5) |
|                                                     | 130 | 9.048                   | 14.81(4)   | 12.83(4)    | 7.154(16)   | 90 | 92.21(11)  | 90 | 1359(6)   |
|                                                     | 140 | 7.352                   | 15.35(18)  | 12.93(15)   | 7.21(7)     | 90 | 92.0(3)    | 90 | 1430(30)  |
|                                                     | 150 | 4.937                   | 15.43(12)  | 12.62(8)    | 6.81(5)     | 90 | 92.1(3)    | 90 | 1324(16)  |
|                                                     | 160 | 4.158                   | 15.4(2)    | 12.80(19)   | 6.52(11)    | 90 | 94.0(2)    | 90 | 1280(40)  |
|                                                     | 170 | 4.265                   | 14.98(13)  | 12.59(8)    | 6.38(6)     | 90 | 93.5(2)    | 90 | 1202(17)  |
|                                                     | 180 | 4.161                   | 15.56(17)  | 13.00(13)   | 6.60(8)     | 90 | 93.5(2)    | 90 | 1330(30)  |
|                                                     | 190 | 4.082                   | 15.2(2)    | 13.01(18)   | 6.48(9)     | 90 | 93.3(2)    | 90 | 1280(30)  |
|                                                     | 200 | 4.265                   | 15.77(16)  | 13.07(12)   | 6.63(7)     | 90 | 93.8(2)    | 90 | 1360(20)  |
|                                                     | 210 | 4.210                   | 15.3(2)    | 13.17(16)   | 6.52(9)     | 90 | 92.81(18)  | 90 | 1310(30)  |
|                                                     | 220 | 4.288                   | 15.8(3)    | 13.4(2)     | 6.69(14)    | 90 | 93.4(2)    | 90 | 1410(50)  |
|                                                     | 230 | 4.271                   | 15.70(15)  | 13.06(10)   | 6.65(7)     | 90 | 93.7(2)    | 90 | 1360(20)  |
|                                                     | 240 | 4.306                   | 15.4(2)    | 12.71(18)   | 6.58(8)     | 90 | 94.1(3)    | 90 | 1290(30)  |
|                                                     | 250 | 4.222                   | 15.0(3)    | 12.8(2)     | 6.41(11)    | 90 | 93.6(2)    | 90 | 1230(40)  |

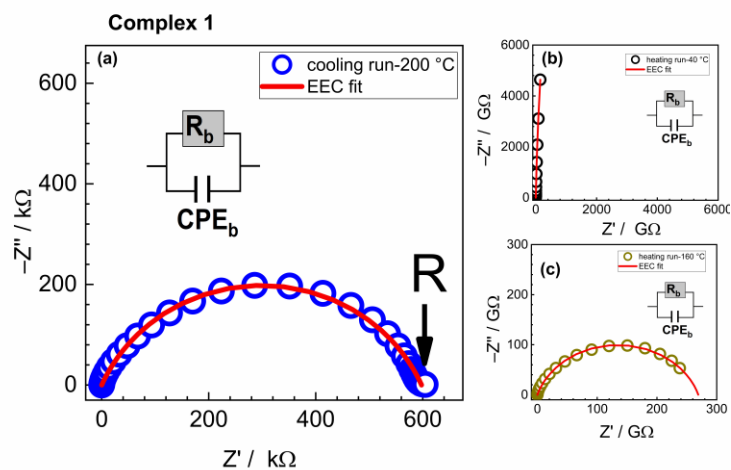

**Fig S35.:** Complex impedance spectra for **complex 1** at various temperatures in heating/cooling run. The coloured open circles denote experimental values, whereas the solid red line corresponds to the best fit. The corresponding equivalent circuit model is composed of parallel combinations of the resistor (R) and the constant-phase element (CPE), used for fitting the data of individual spectra.

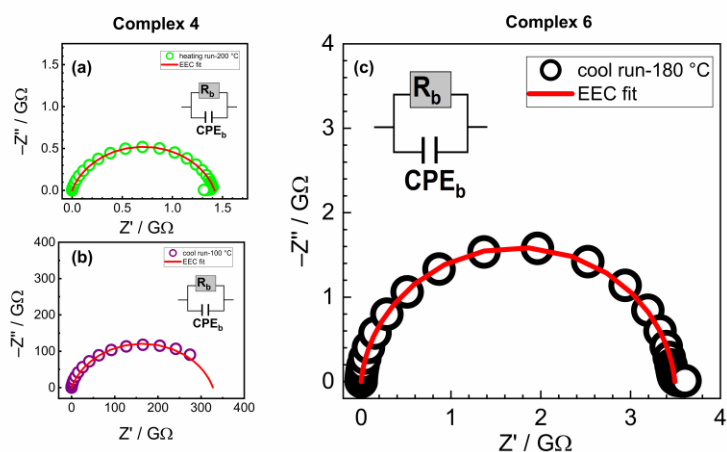

**Fig S36.** Complex impedance spectra for **complex 4** (a,b) and **complex 6** (c), at various temperatures in heating/cooling run. The coloured open circles denote experimental values, whereas the solid red line corresponds to the best fit. The corresponding equivalent circuit model is composed of parallel combinations of the resistor (R) and the constant-phase element (CPE), used for fitting the data of individual spectra.

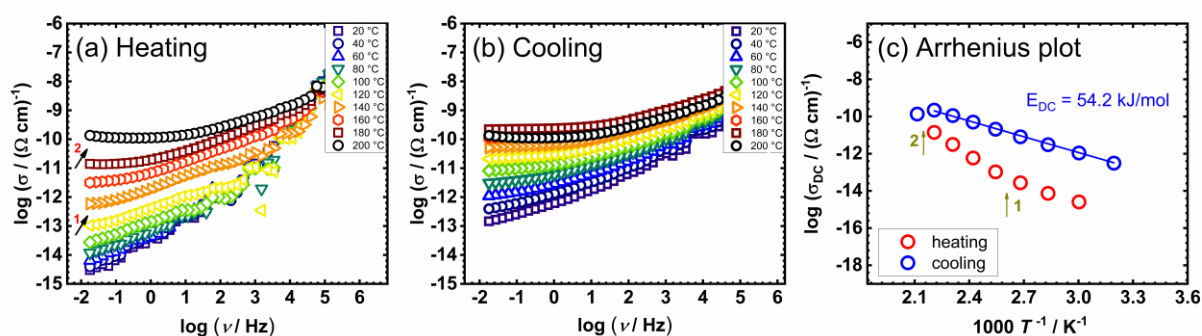

**Figure S37.** Conductivity spectra for mononuclear  $\text{VO}(\text{L}^1)(\text{OMe})(\text{MeOH})$  sample (complex **2**) in heating (a) and cooling (b) runs, and (c) temperature dependence of DC conductivity ( $\log(\sigma_{\text{DC}})$  vs.  $1000/T$ ) for both runs (red circle—heating, blue circle—cooling).

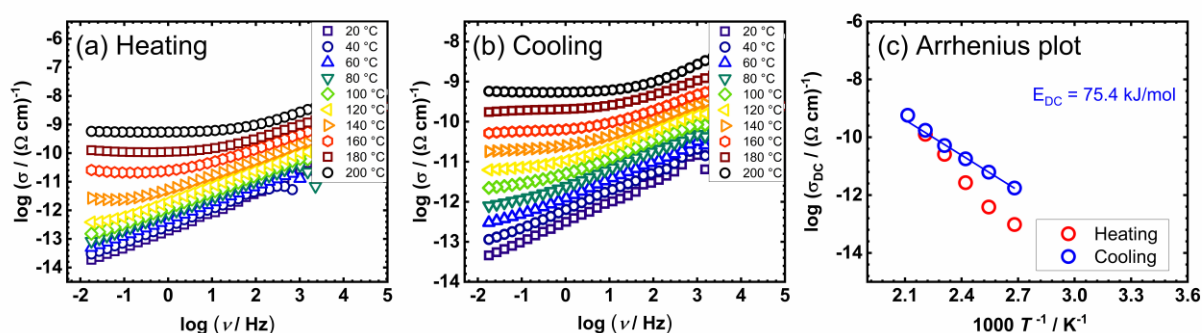

**Figure S38.** Conductivity spectra for mononuclear  $[\text{VO}_2(\text{HL}^2)]$  sample (complex **4**) in heating (a) and cooling (b) runs, and (c) temperature dependence of DC conductivity ( $\log(\sigma_{\text{DC}})$  vs.  $1000/T$ ) for both runs (red circle—heating, blue circle—cooling).

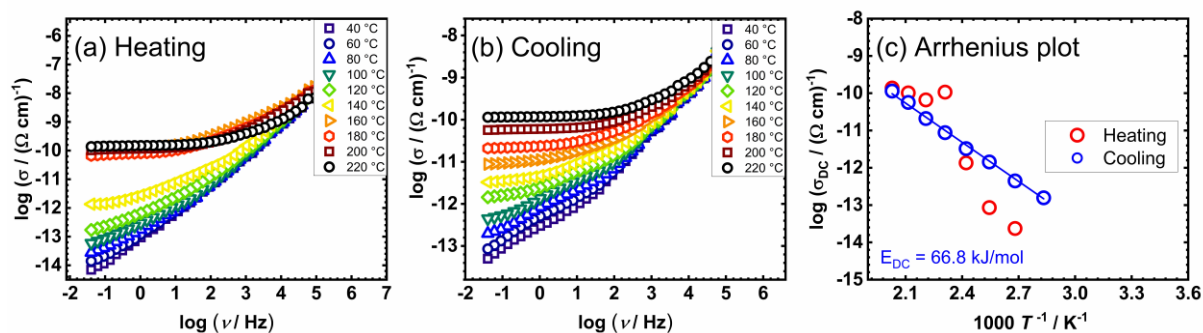

**Figure S39.** Conductivity spectra for mononuclear  $[\text{VO}(\text{L}^3)(\text{OMe})(\text{MeOH})]$  sample (complex **7**) in heating (a) and cooling (b) runs, and (c) temperature dependence of DC conductivity ( $\log(\sigma_{\text{DC}})$  vs.  $1000/T$ ) for both runs (red circle—heating, blue circle—cooling).
